# Supplementary material
Source: MDPI journal article supplement (https://www.mdpi.com/search?q=molecules-24-00979)

# Supporting Information

## Sulfonylimino group transfer reaction using imino- $\lambda^3$ -iodanes with I<sub>2</sub> under metal-free conditions

Akira Yoshimura <sup>1,2,\*</sup>, Cody L. Makitalo <sup>2</sup>, Melissa E. Jarvi <sup>2</sup>, Michael T. Shea <sup>2</sup>, Pavel S. Postnikov <sup>1</sup>, Gregory T. Rohde <sup>3</sup>, Viktor V. Zhdankin <sup>2</sup>, Akio Saito <sup>4</sup>, and Mekhman S. Yusubov <sup>1</sup>

<sup>1</sup> The Tomsk Polytechnic University, 634050 Tomsk, Russia

<sup>2</sup> Department of Chemistry and Biochemistry, University of Minnesota Duluth, MN 55812, USA

<sup>3</sup> Marshall School, Duluth, Minnesota 55811 USA

<sup>4</sup> Division of Applied Chemistry, Institute of Engineering, Tokyo University of Agriculture and Technology, 2-24-16 Naka-cho, Koganei, Tokyo 184-8588, Japan

\* Correspondence: yoshimura@tpu.ru; ayoshimu@d.umn.edu

|                                                  |            |
|--------------------------------------------------|------------|
| <b>Table of Contents:</b>                        | <b>pp</b>  |
| <b>1. <i>X-Ray crystallography data of 5</i></b> | <b>p.2</b> |
| <b>2. <i>Spectra of products</i></b>             | <b>p.3</b> |

### *X-Ray crystallography data of 5*

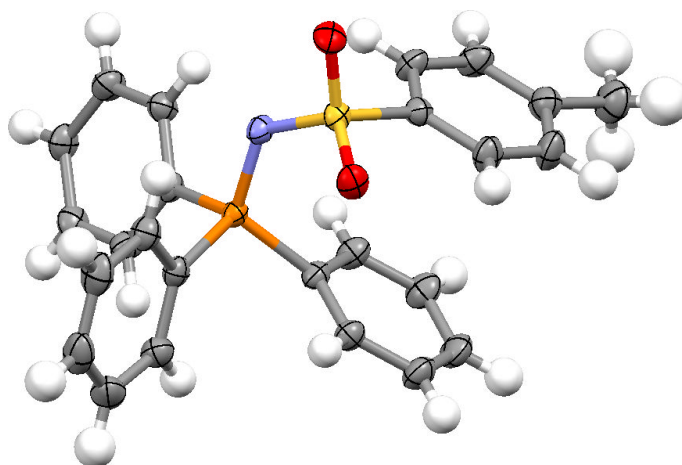

Figure S1. X-Ray crystal structure of **5**.

Single crystals of product **5** suitable for X-ray crystallographic analysis were obtained by slow crystallization from dichloromethane solution. X-ray diffraction data for **5** were collected on Rigaku RAPID II Image Plate using graphite-monochromated MoK $\alpha$  radiation ( $\lambda = 0.71073 \text{ \AA}$ ) at 173 K. The unit cell of 8.9064(5), 10.5791(6), 13.0086(9), 99.870(7), 107.920(8) and bond metrics for **5** matched the previously reported compound.<sup>1</sup>

### **Reference**

Cameron, A. F.; Hair, N. J.; Morris, D. G. Structural investigations of ylides. IV. Crystal and molecular structure of N-(*p*-toluenesulfonyl)iminotriphenylphosphorane. *Acta Crystallogr., Sect. B* **1974**, *30*, 221-225.

$^1\text{H}$  NMR (500 MHz,  $\text{CDCl}_3$ )

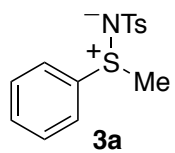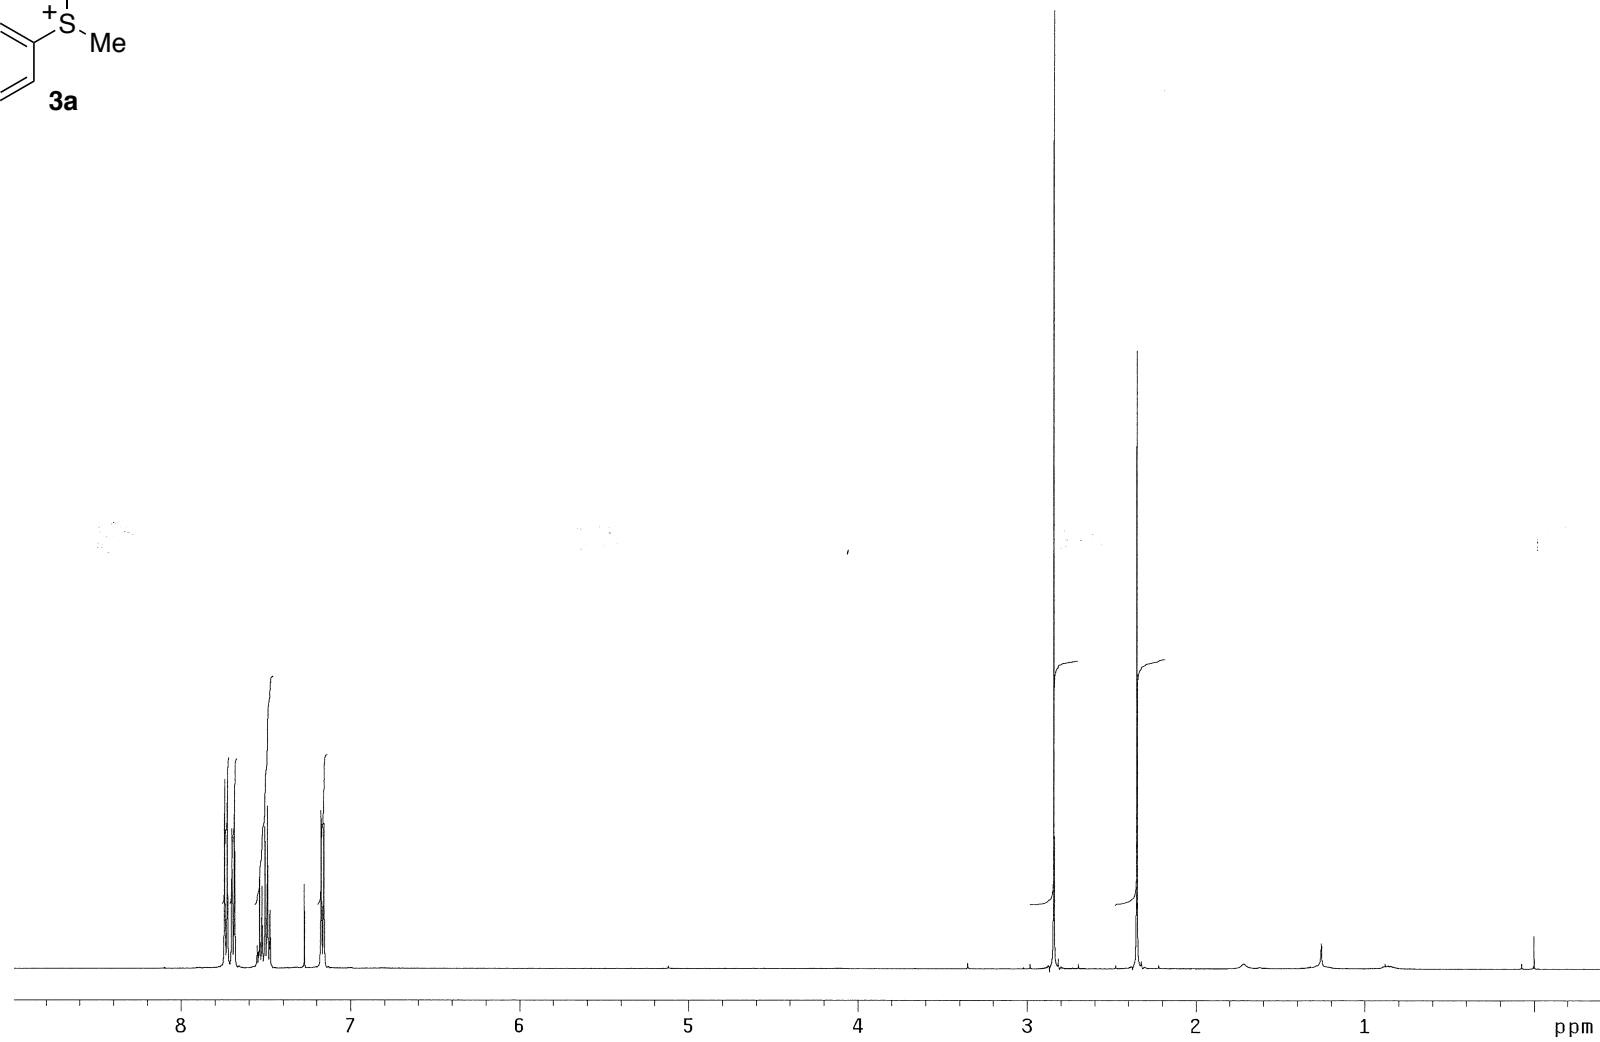

$^1\text{H}$  NMR (500 MHz,  $\text{CDCl}_3$ )

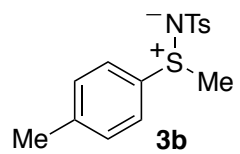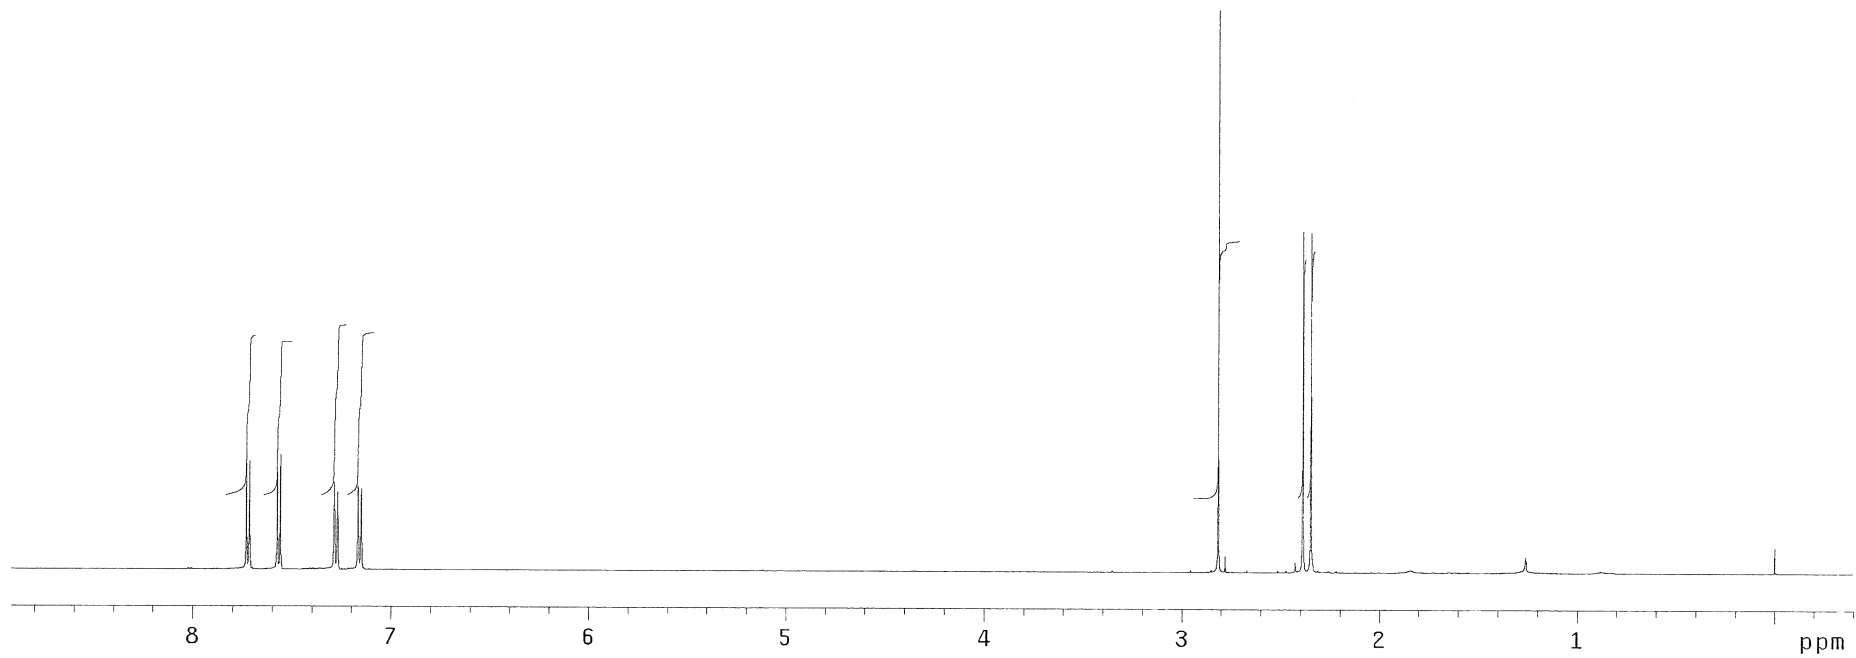



$^1\text{H}$  NMR (500 MHz,  $\text{CDCl}_3$ )

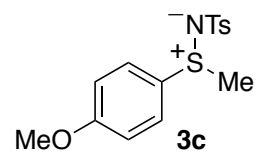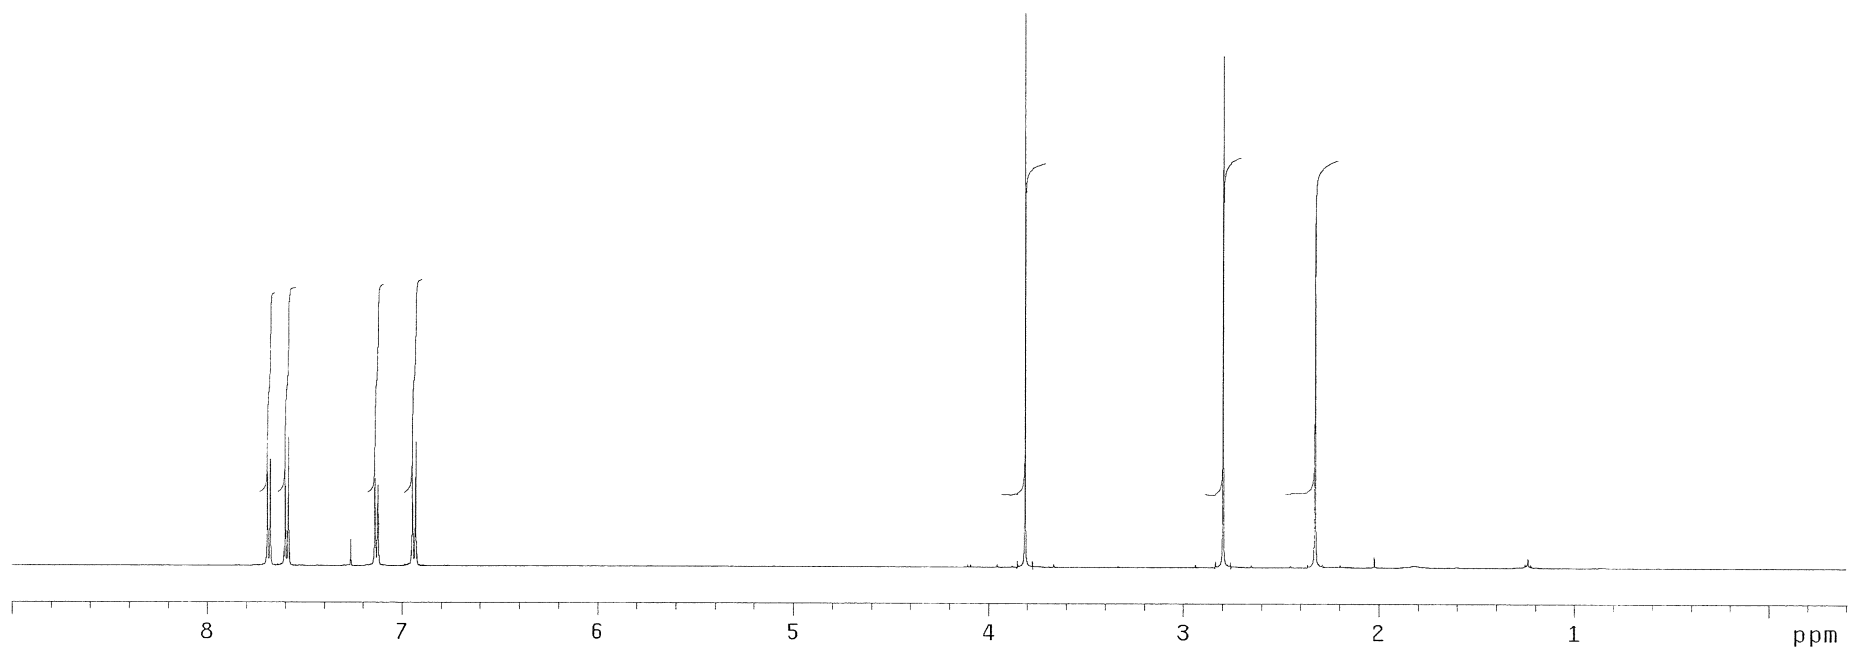

$^1\text{H}$  NMR (500 MHz,  $\text{CDCl}_3$ )

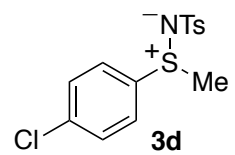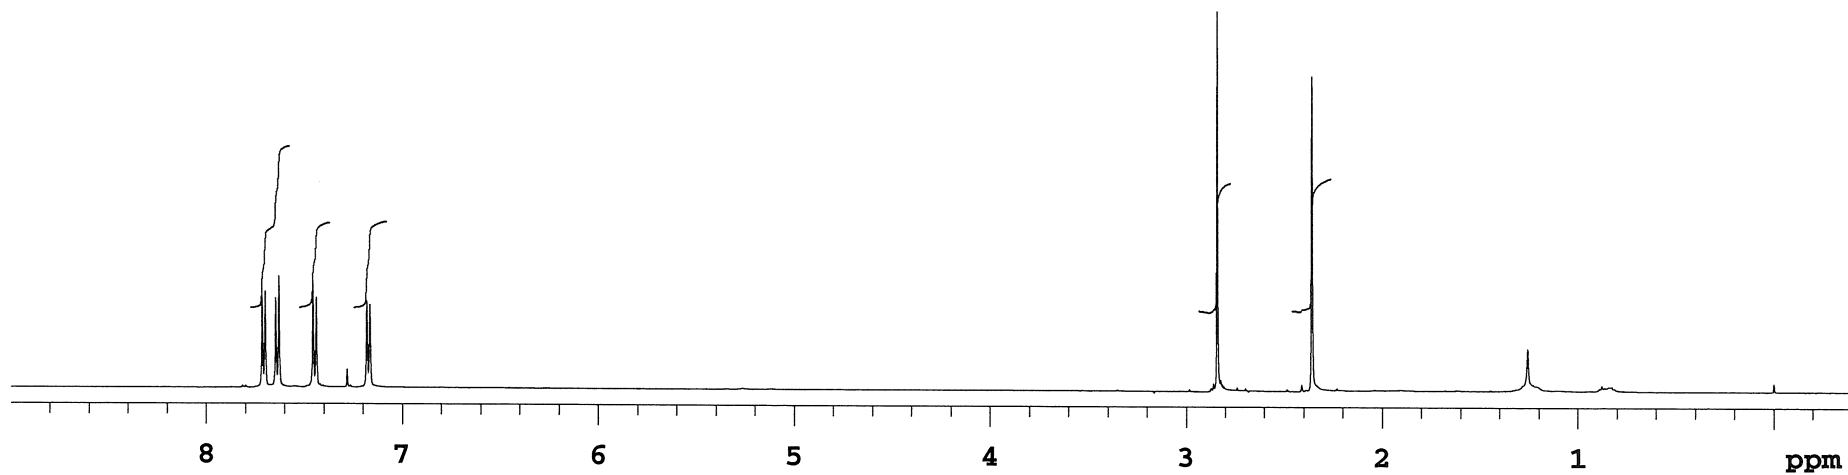

$^1\text{H}$  NMR (500 MHz,  $\text{CDCl}_3$ )

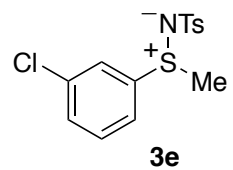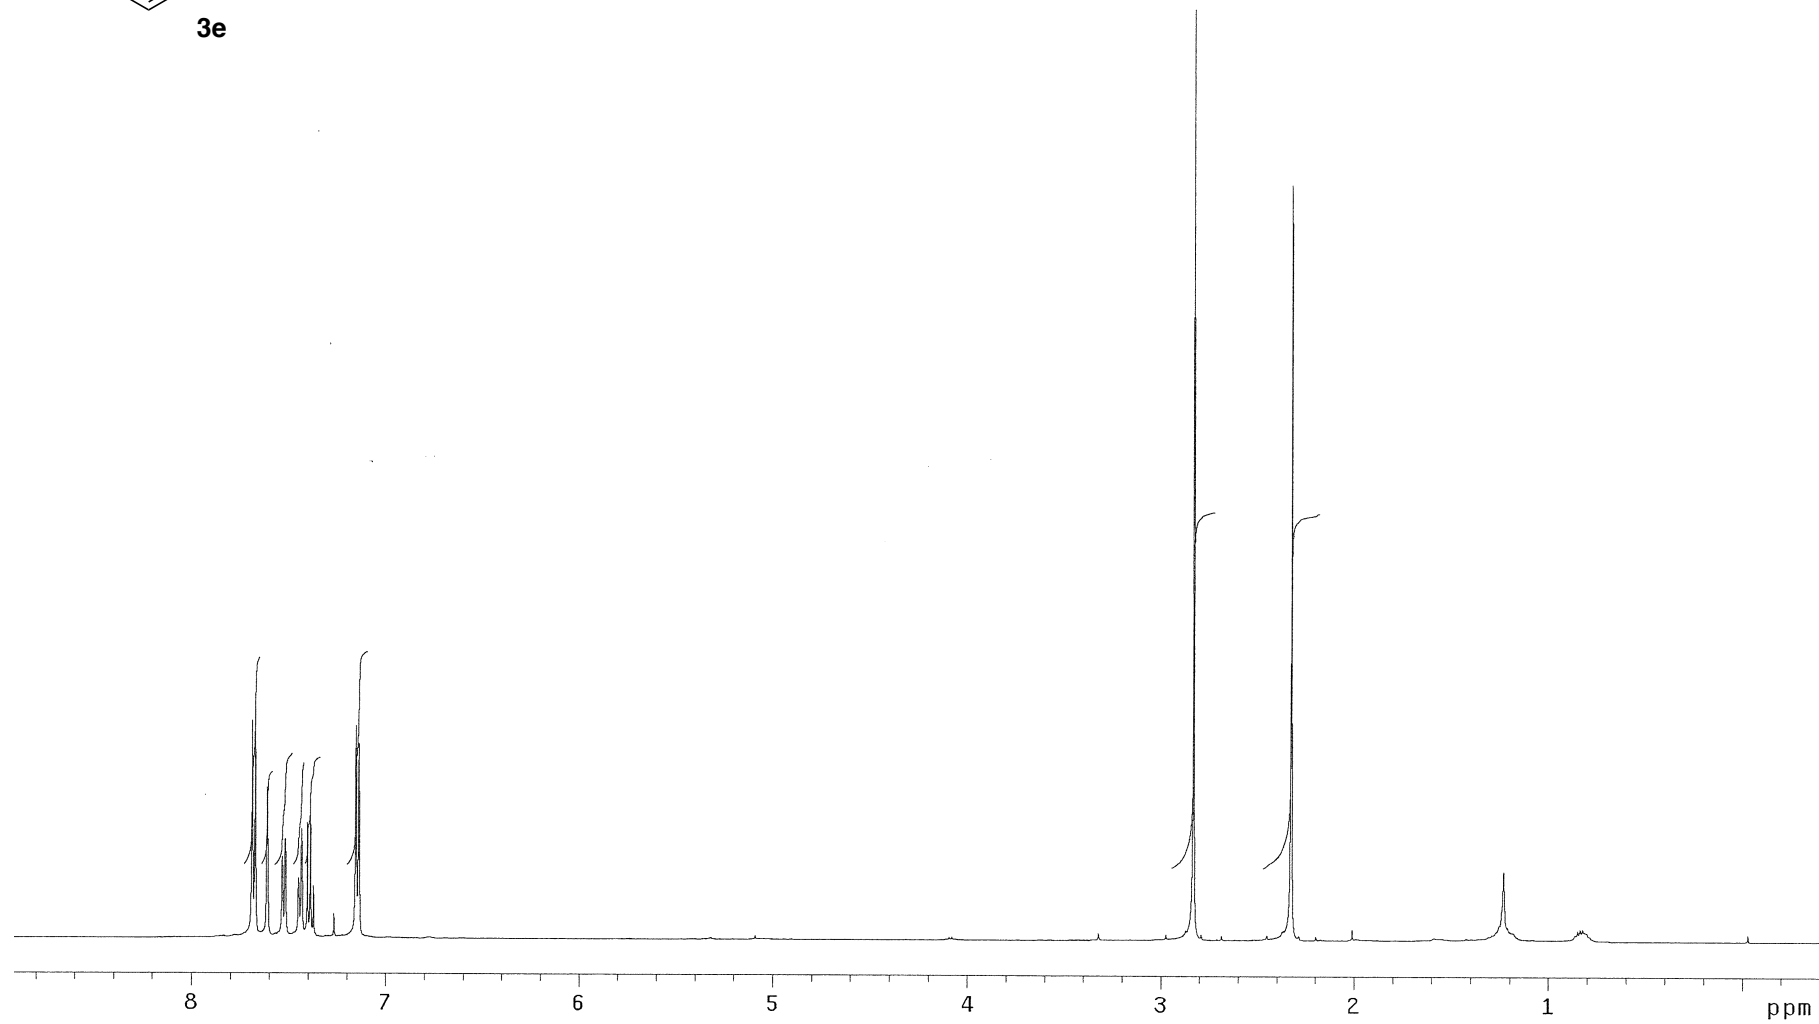

$^1\text{H}$  NMR (500 MHz,  $\text{CDCl}_3$ )

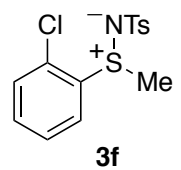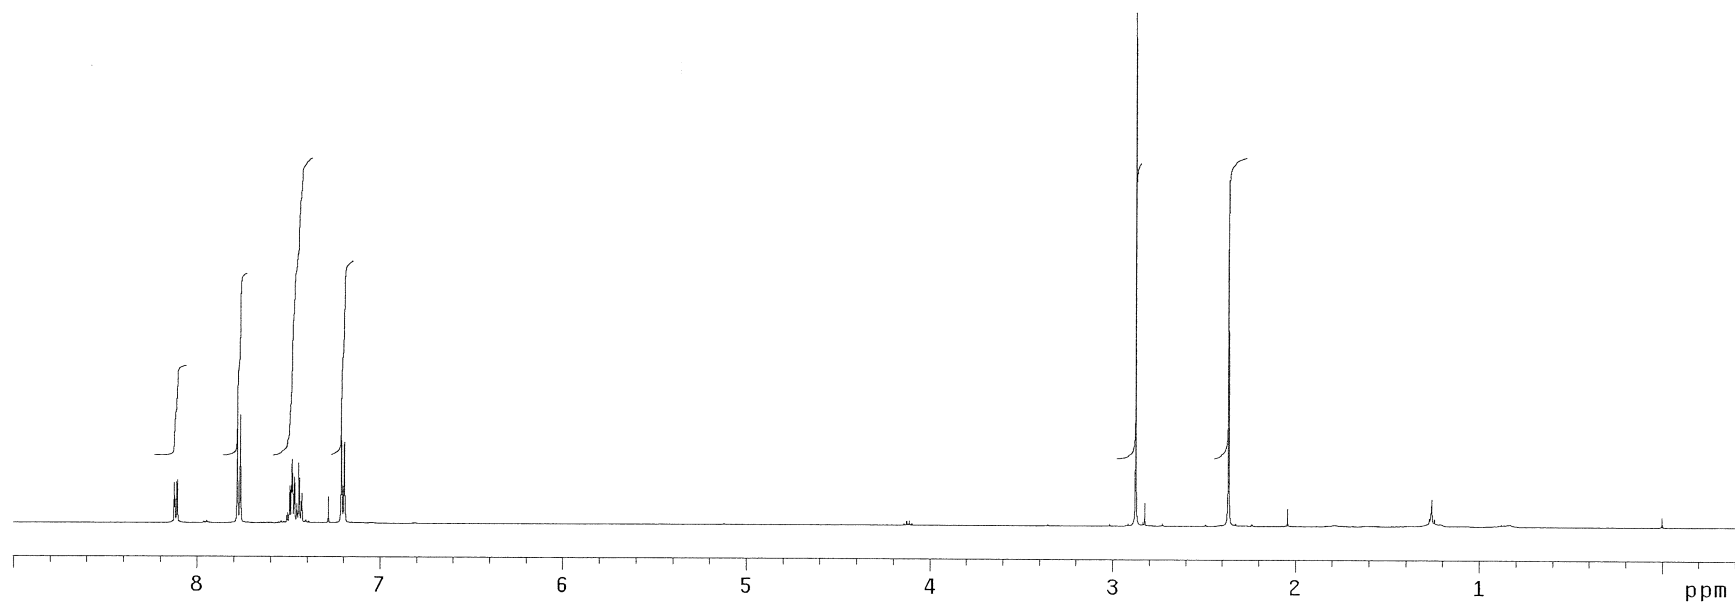

$^1\text{H}$  NMR (500 MHz,  $\text{CDCl}_3$ )

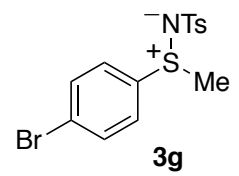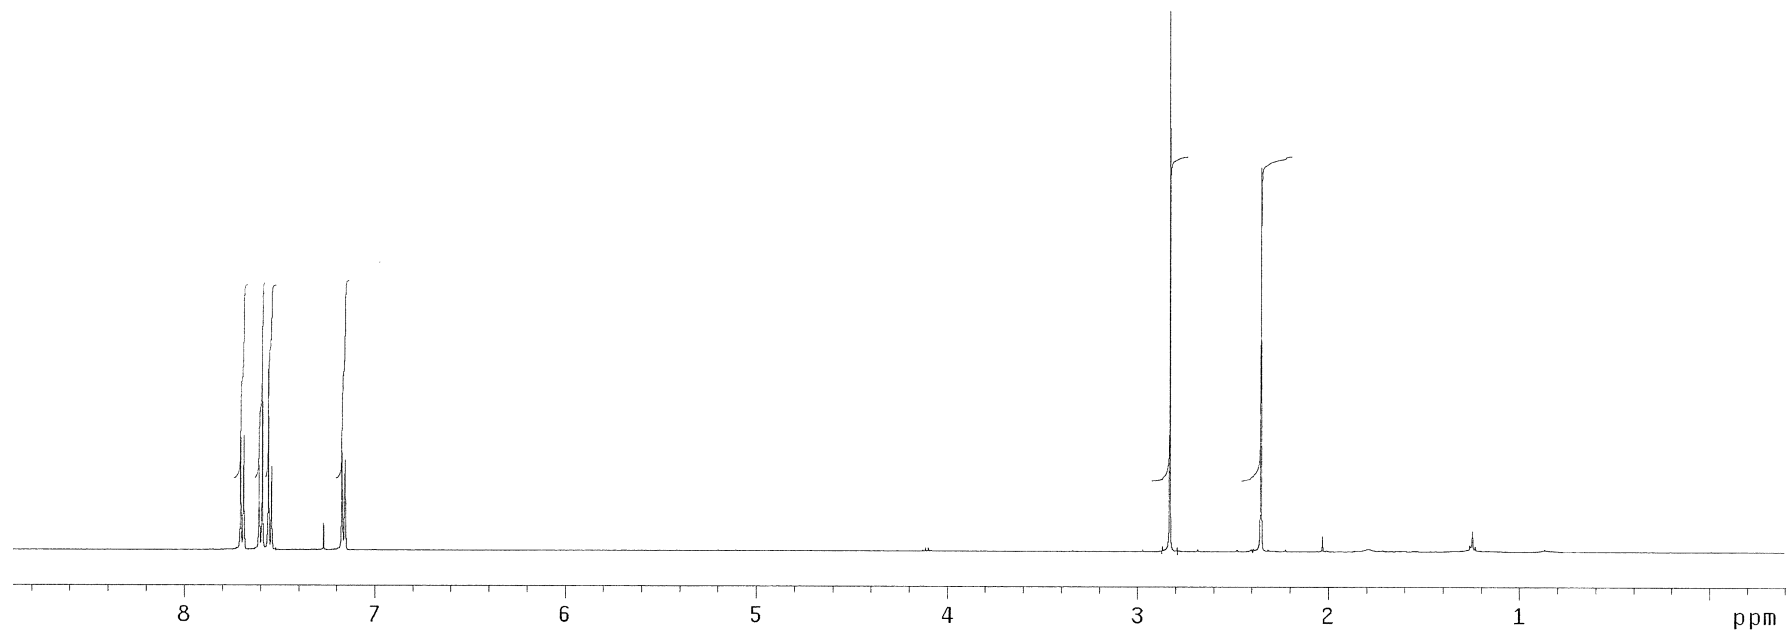

$^1\text{H}$  NMR (500 MHz,  $\text{CDCl}_3$ )

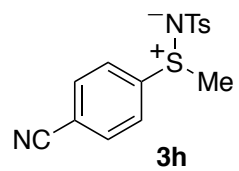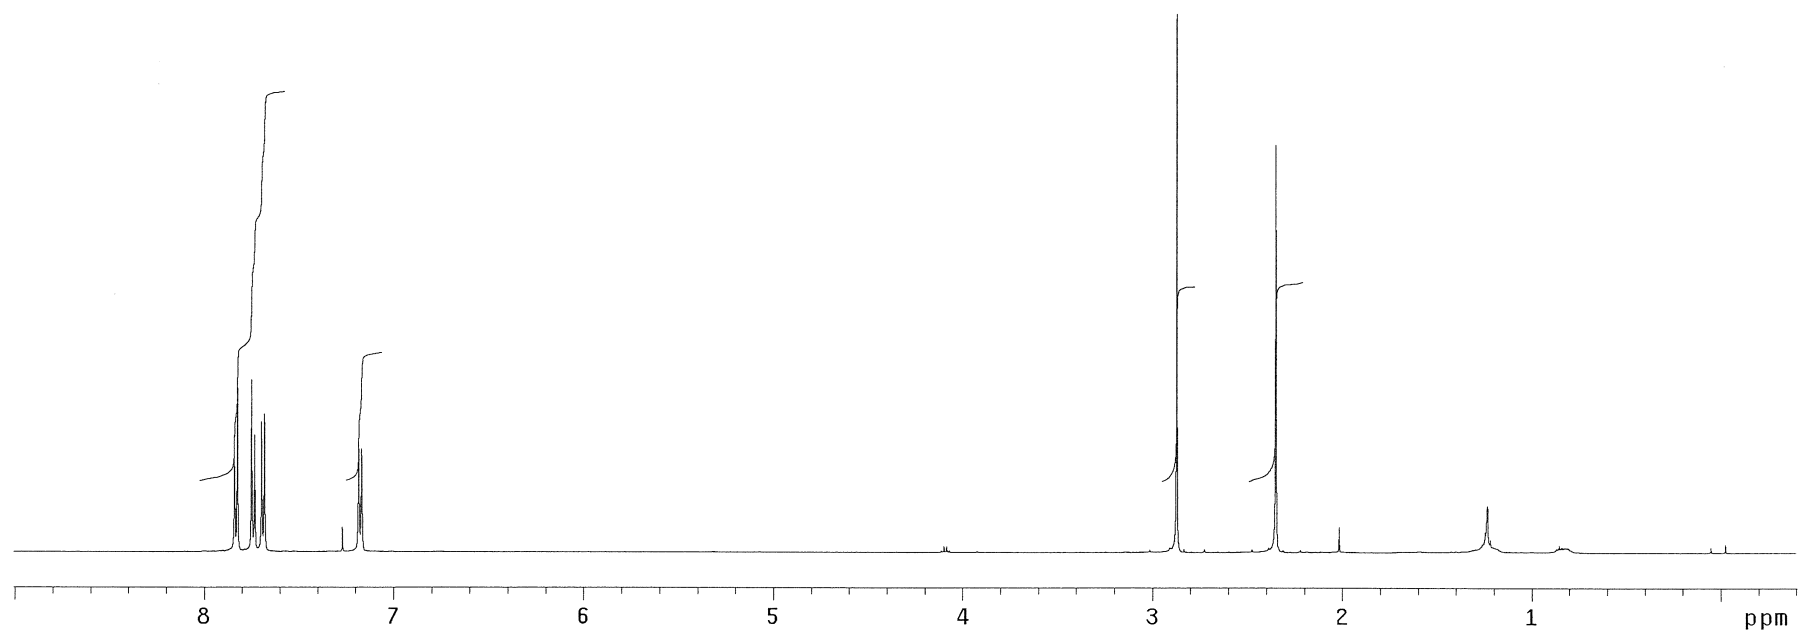

$^{13}\text{C}$  NMR (75 MHz,  $\text{CDCl}_3$ )

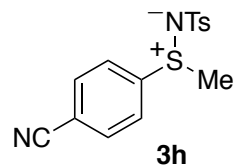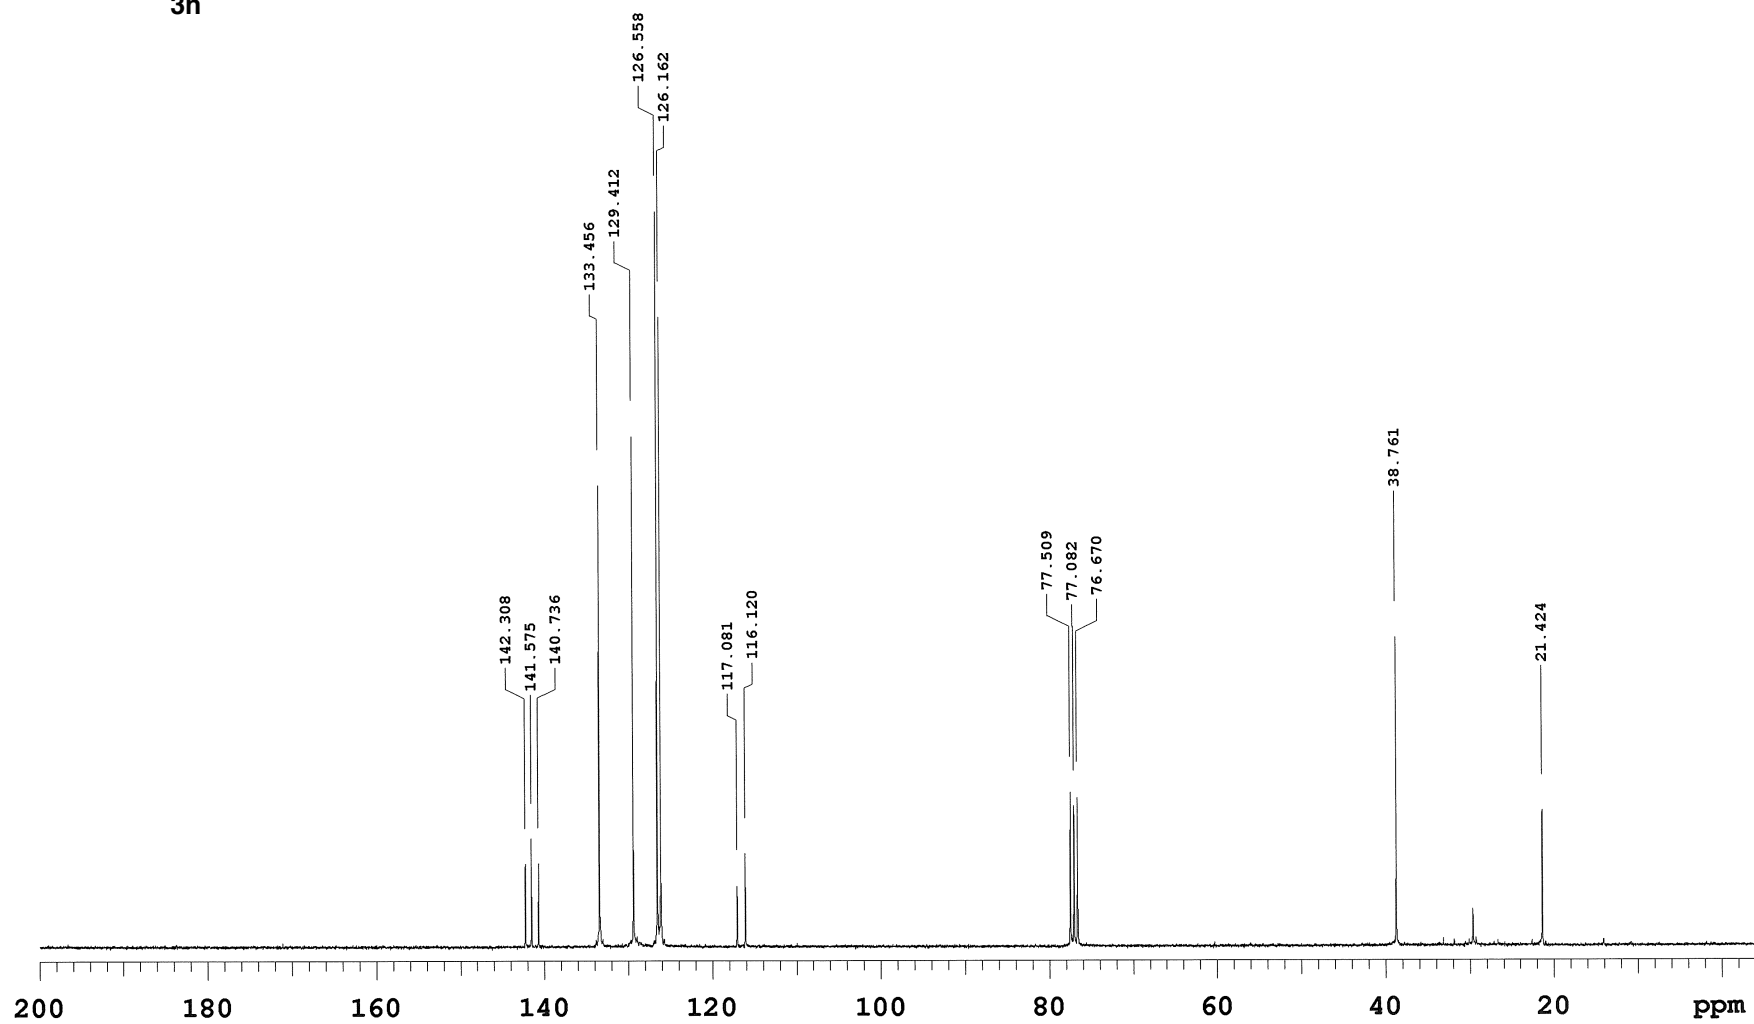

$^1\text{H}$  NMR (500 MHz,  $\text{CDCl}_3$ )

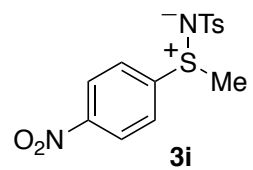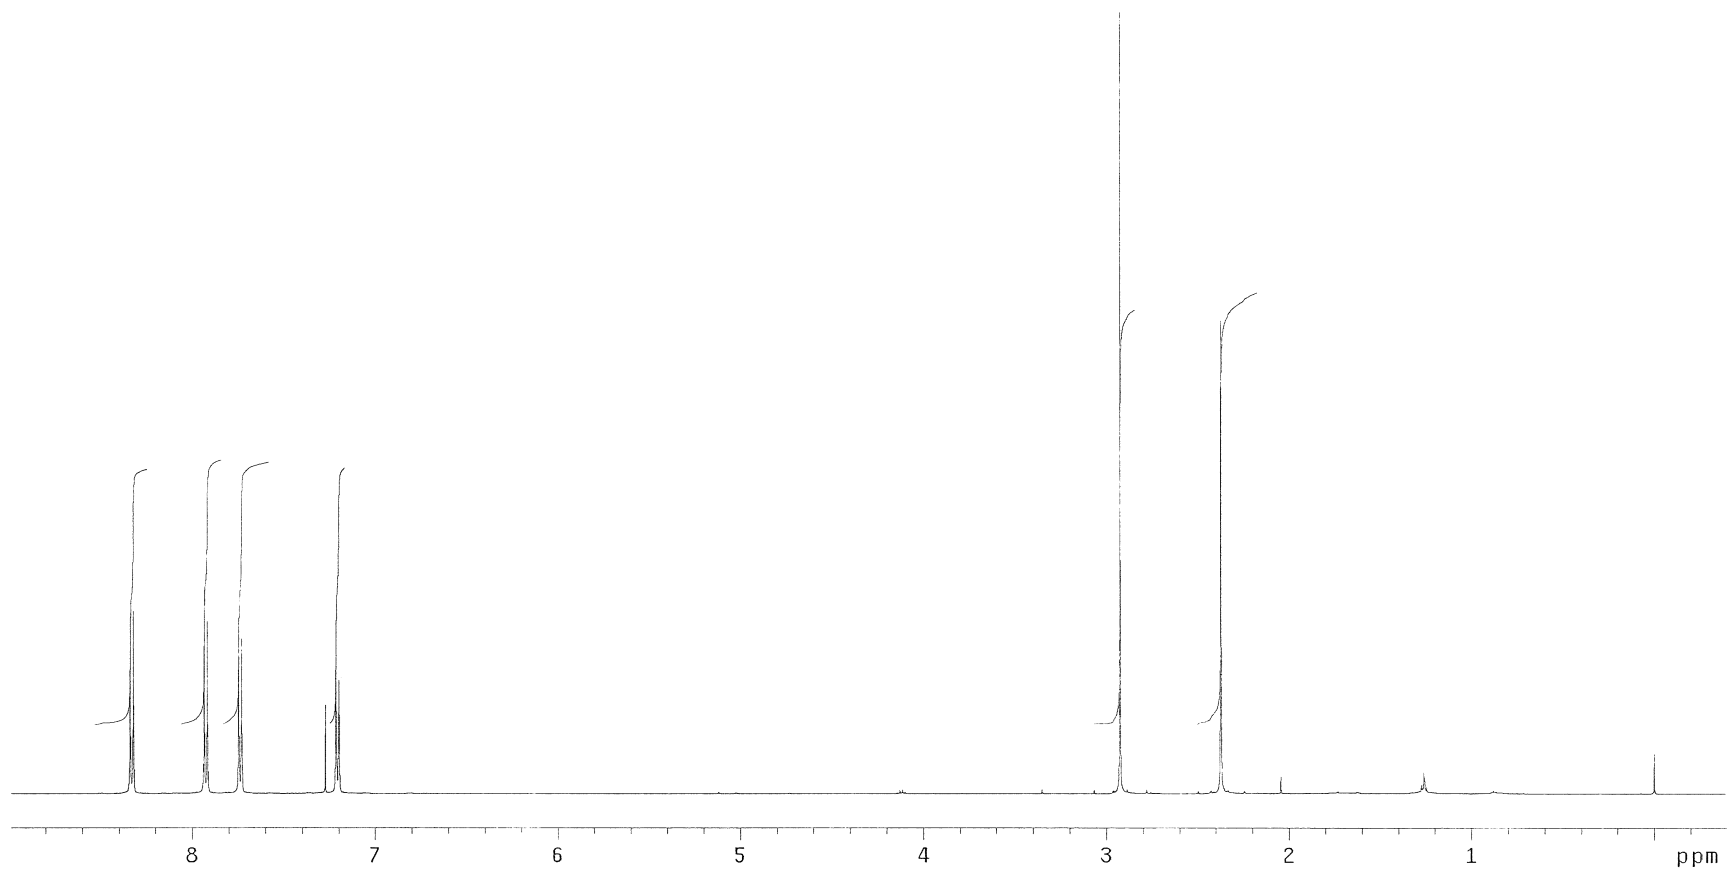



$^1\text{H}$  NMR (500 MHz,  $\text{CDCl}_3$ )

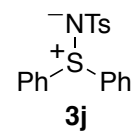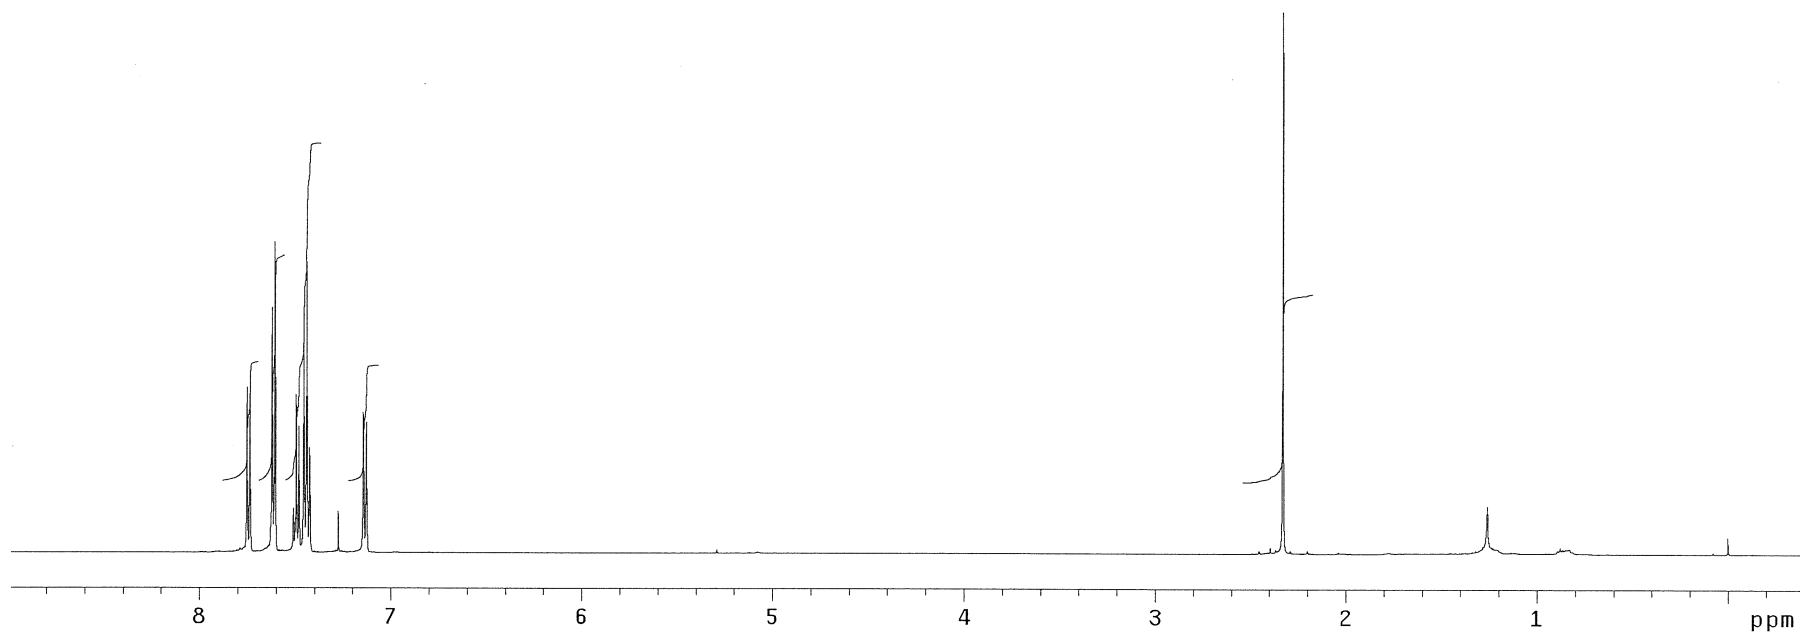

$^1\text{H}$  NMR (500 MHz,  $\text{CDCl}_3$ )

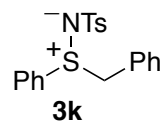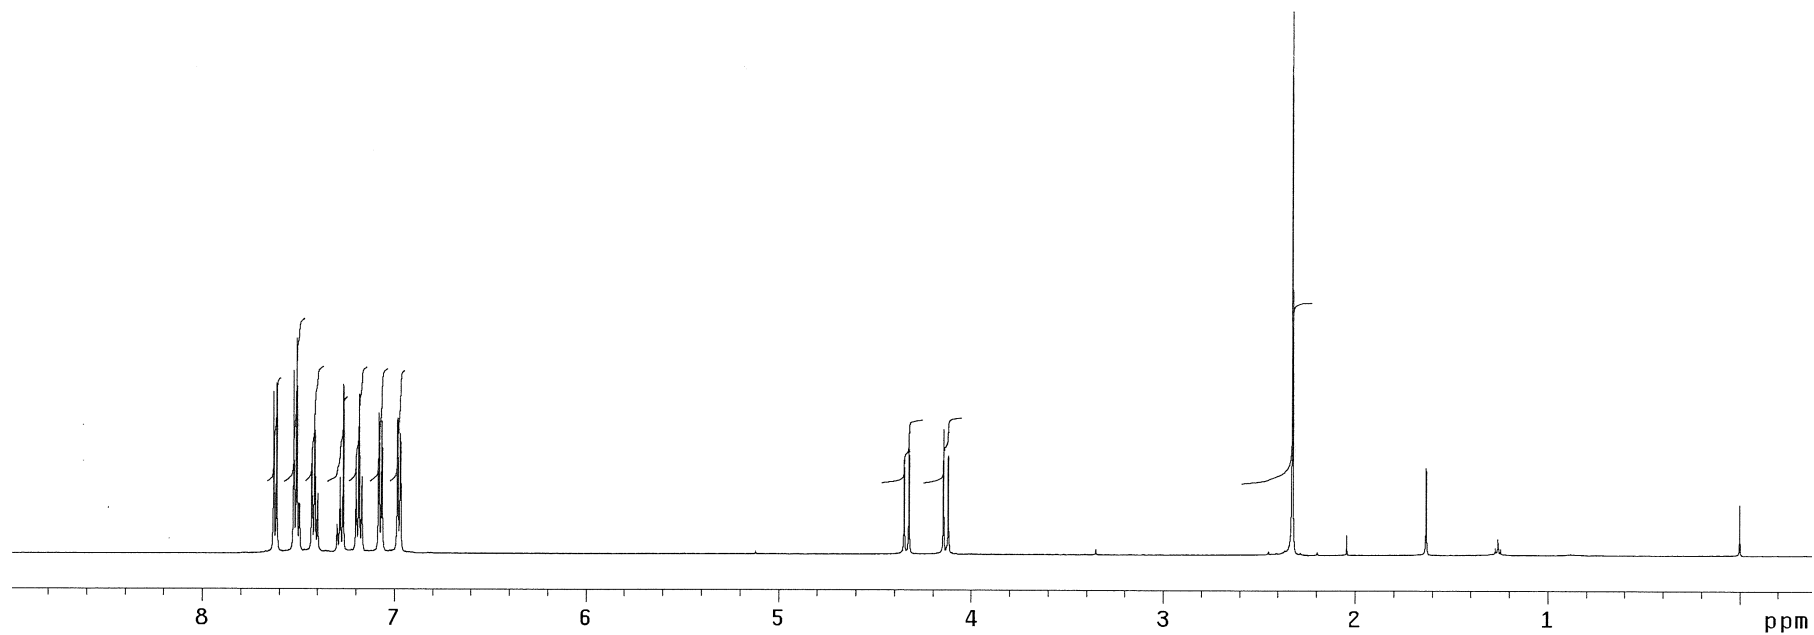

$^1\text{H}$  NMR (500 MHz,  $\text{CDCl}_3$ )

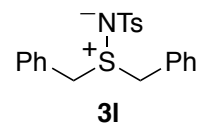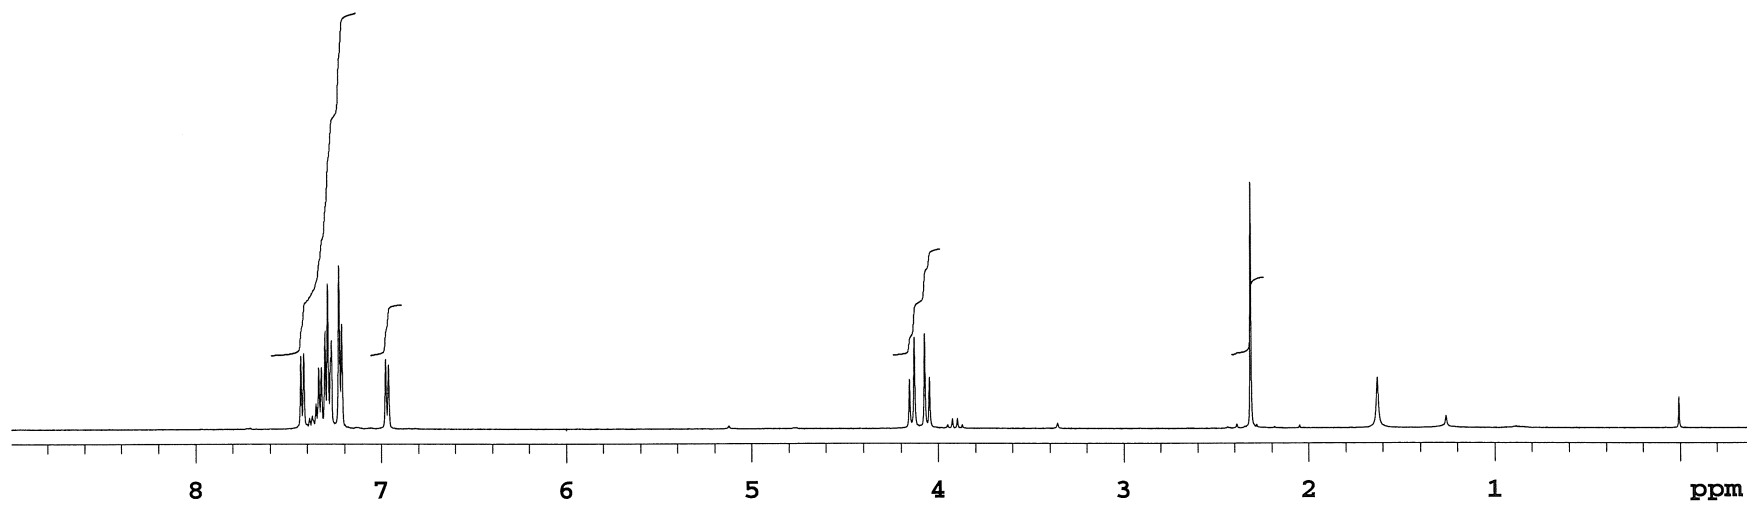

$^1\text{H}$  NMR (500 MHz,  $\text{CDCl}_3$ )

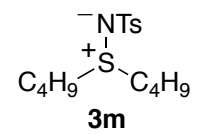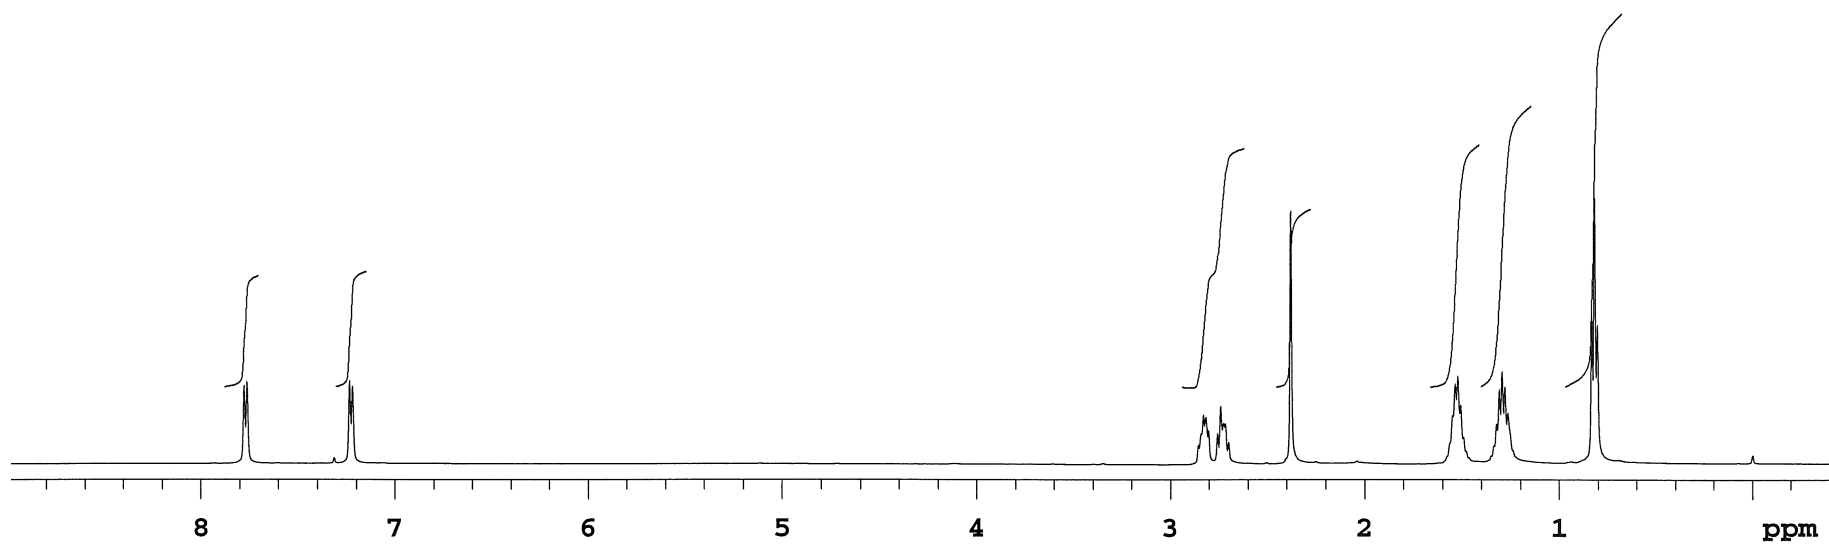

$^1\text{H}$  NMR (500 MHz,  $\text{CDCl}_3$ )

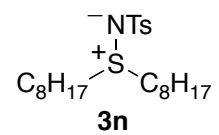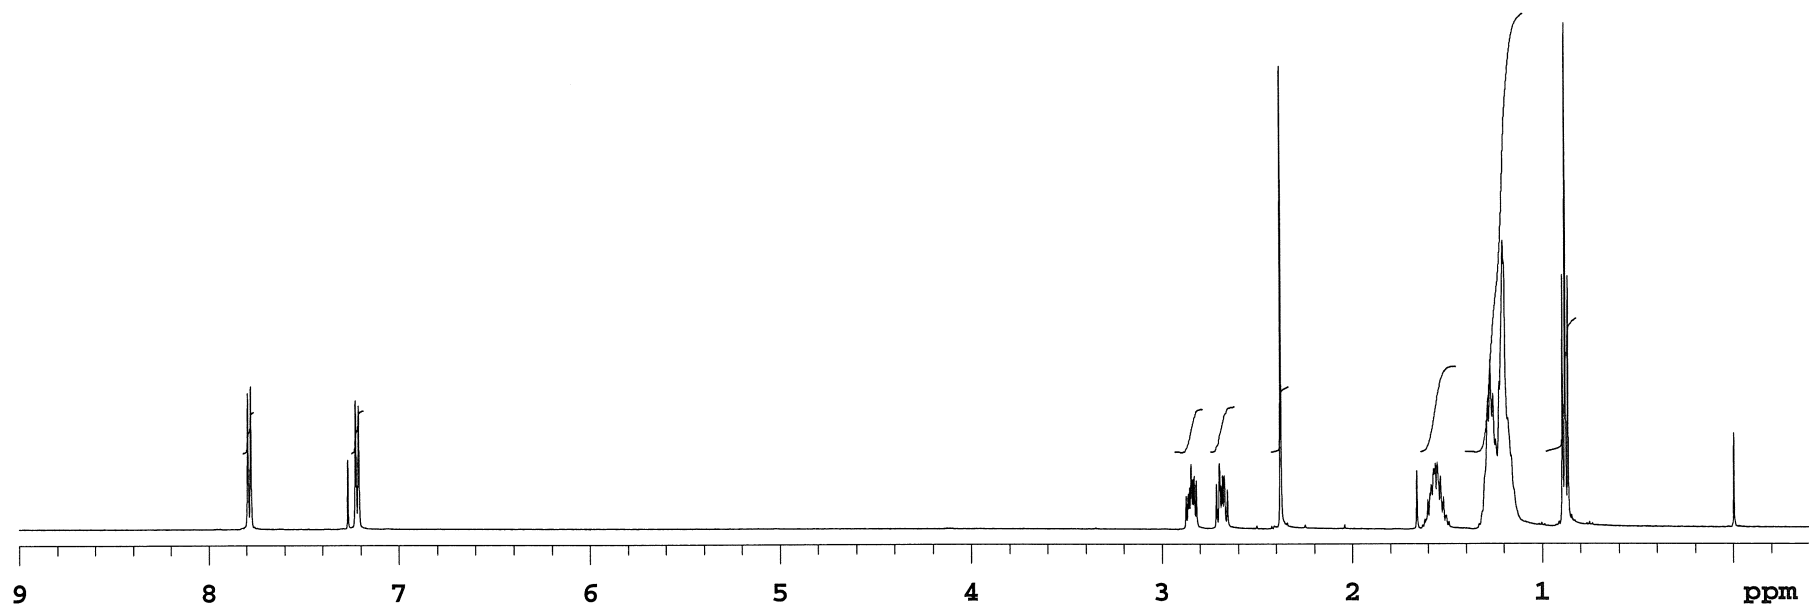

$^{13}\text{C}$  NMR (75 MHz,  $\text{CDCl}_3$ )

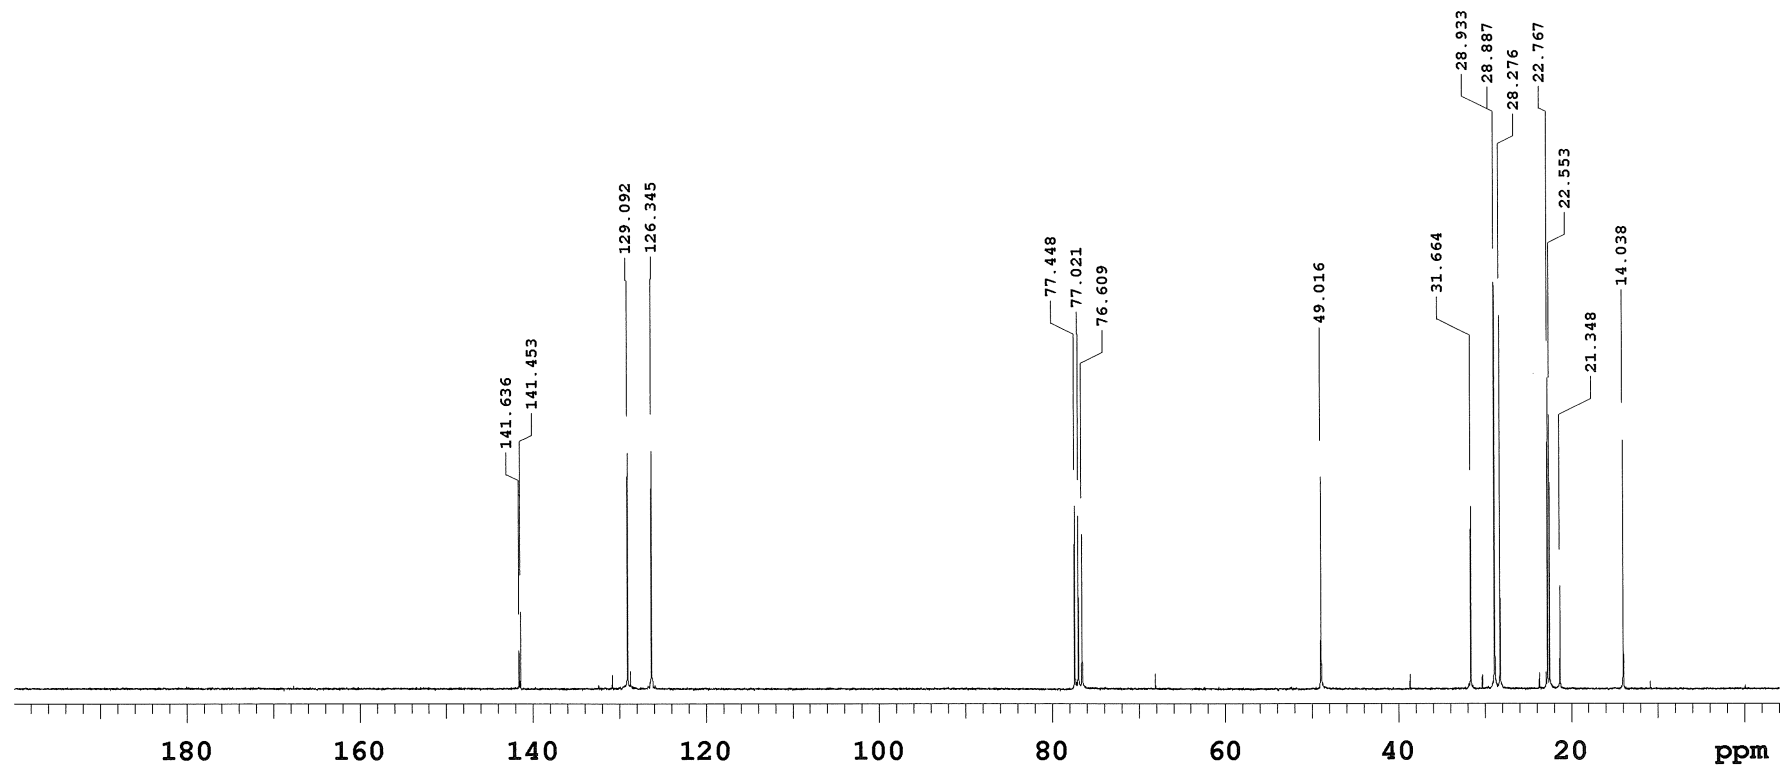

$^1\text{H}$  NMR (300 MHz,  $\text{CDCl}_3$ )

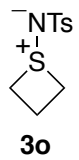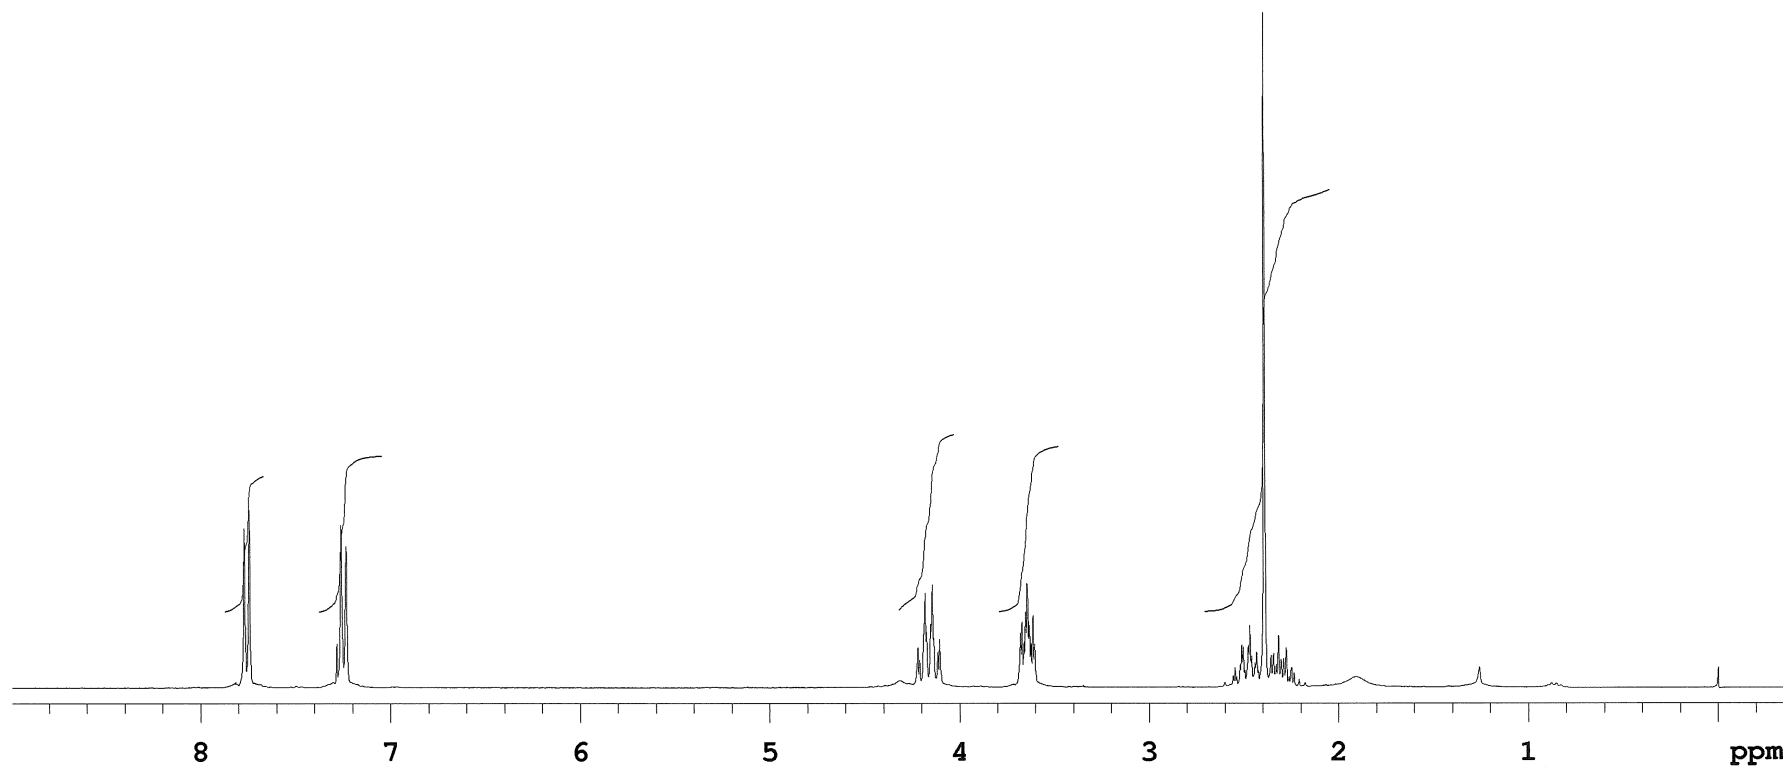

$^1\text{H}$  NMR (300 MHz,  $\text{CDCl}_3$ )

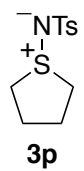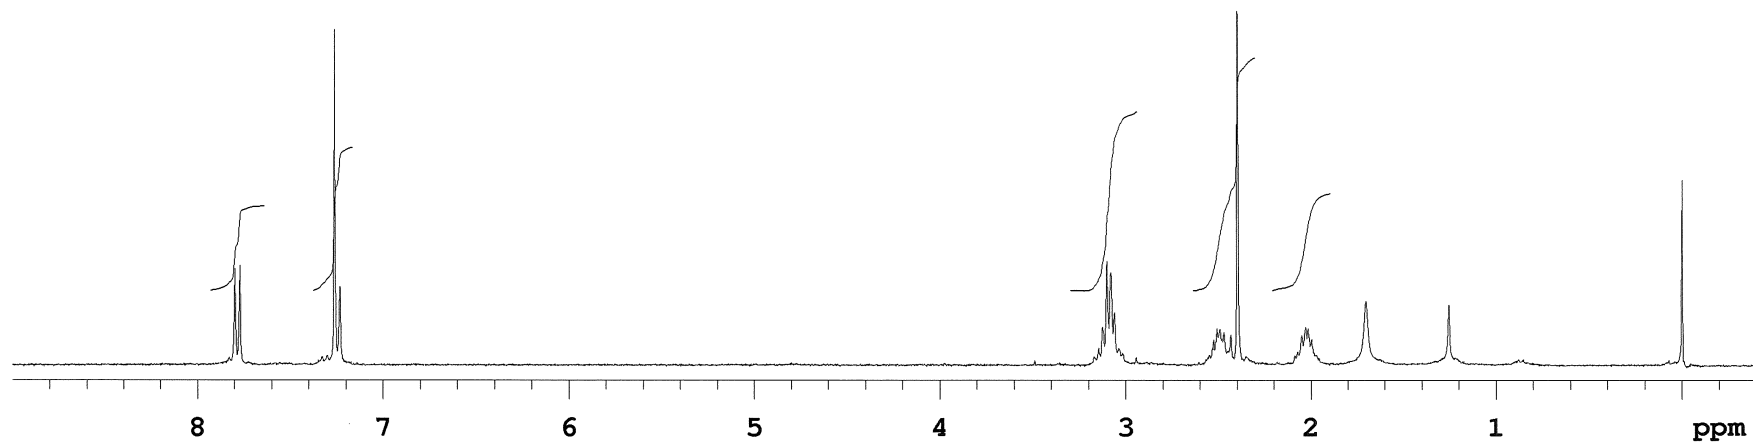



$^{13}\text{C}$  NMR (75 MHz,  $\text{CDCl}_3$ )

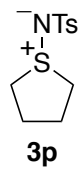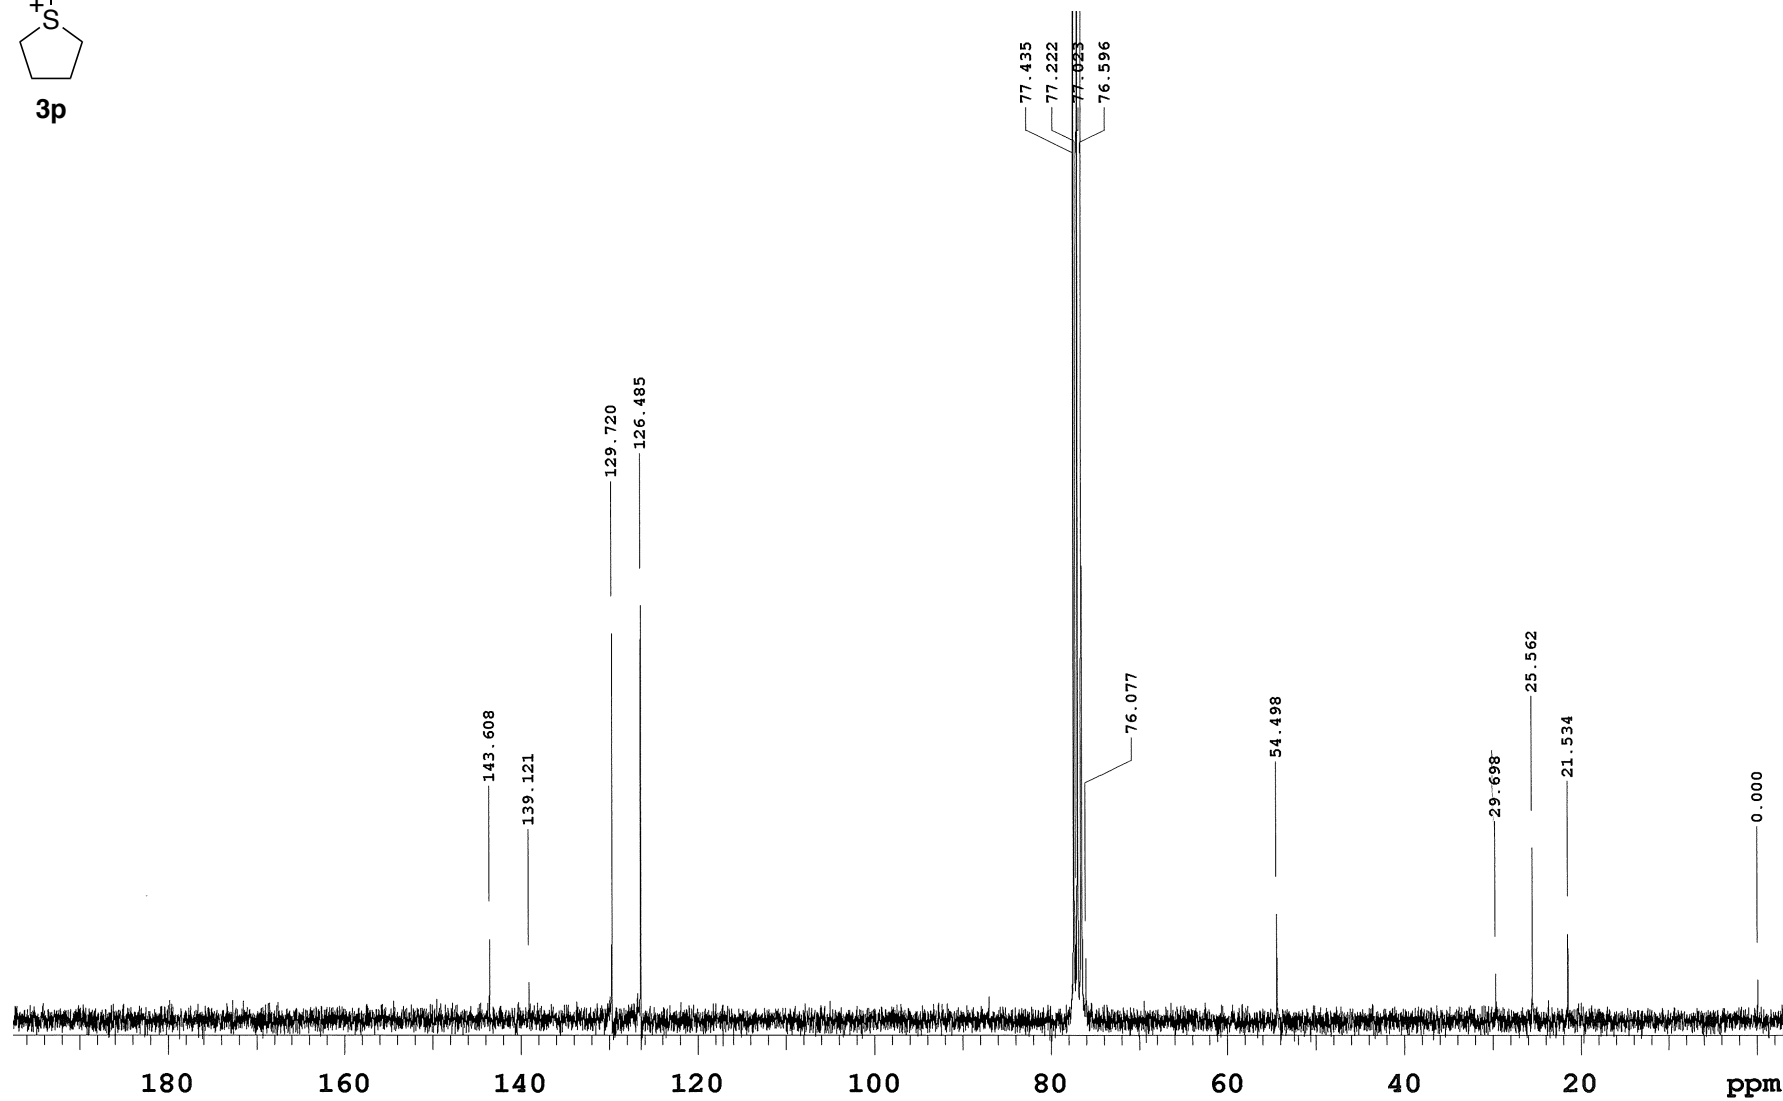

$^1\text{H}$  NMR (500 MHz,  $\text{CDCl}_3$ )

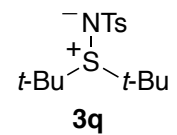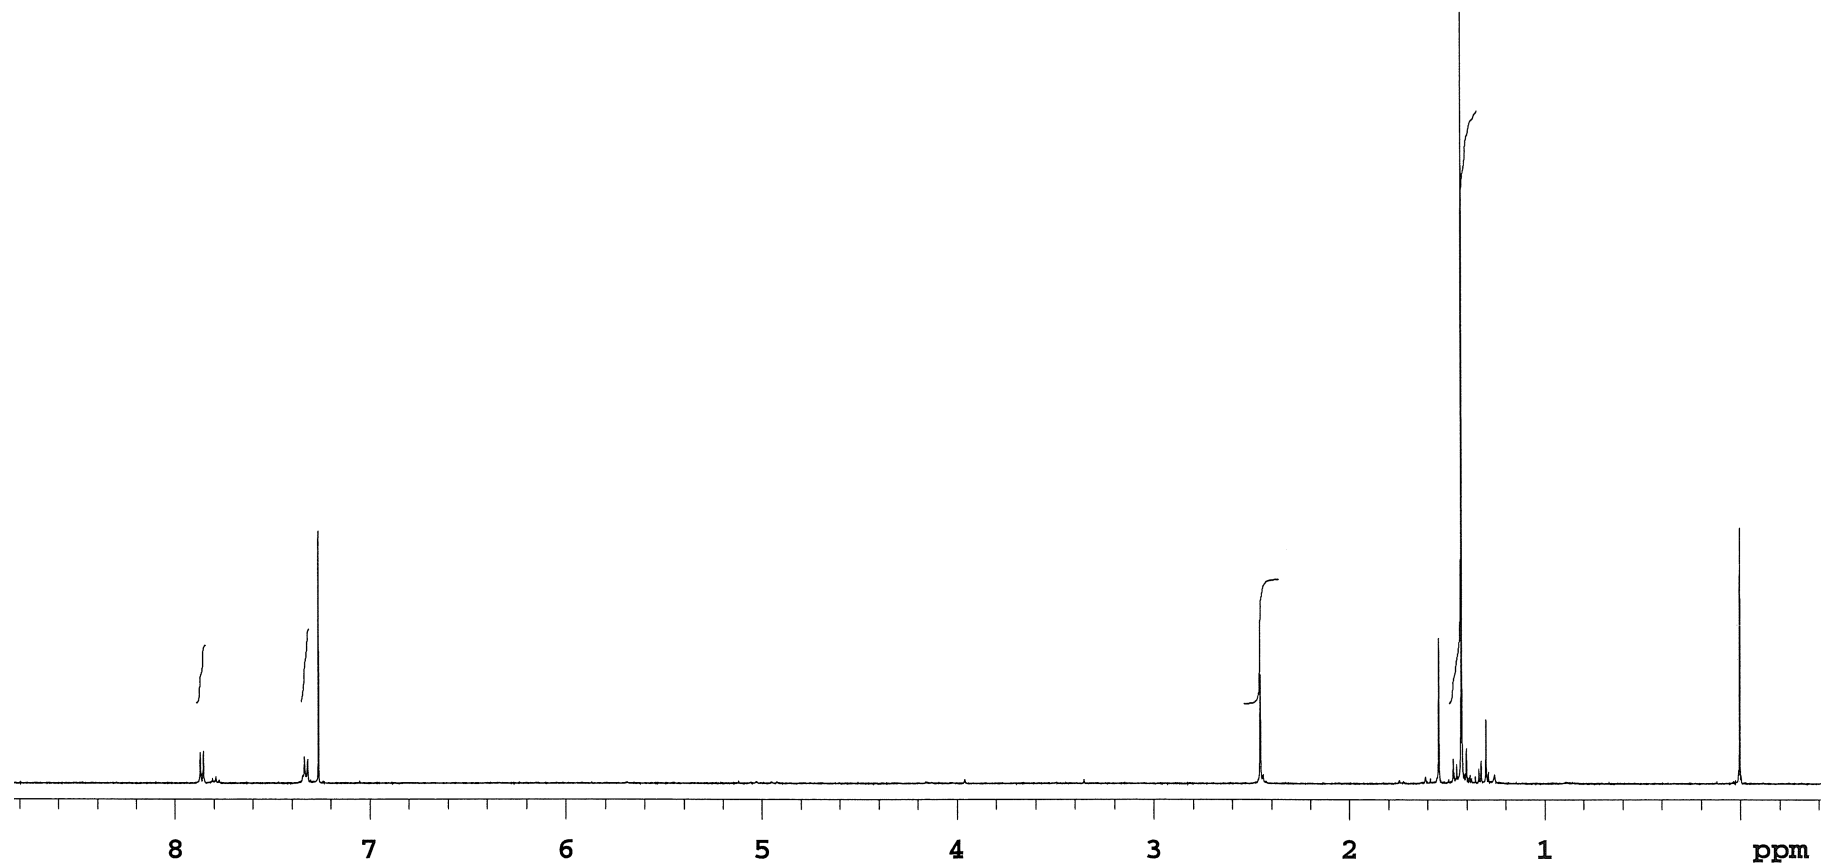

$^{13}\text{C}$  NMR (75 MHz,  $\text{CDCl}_3$ )

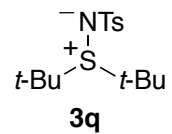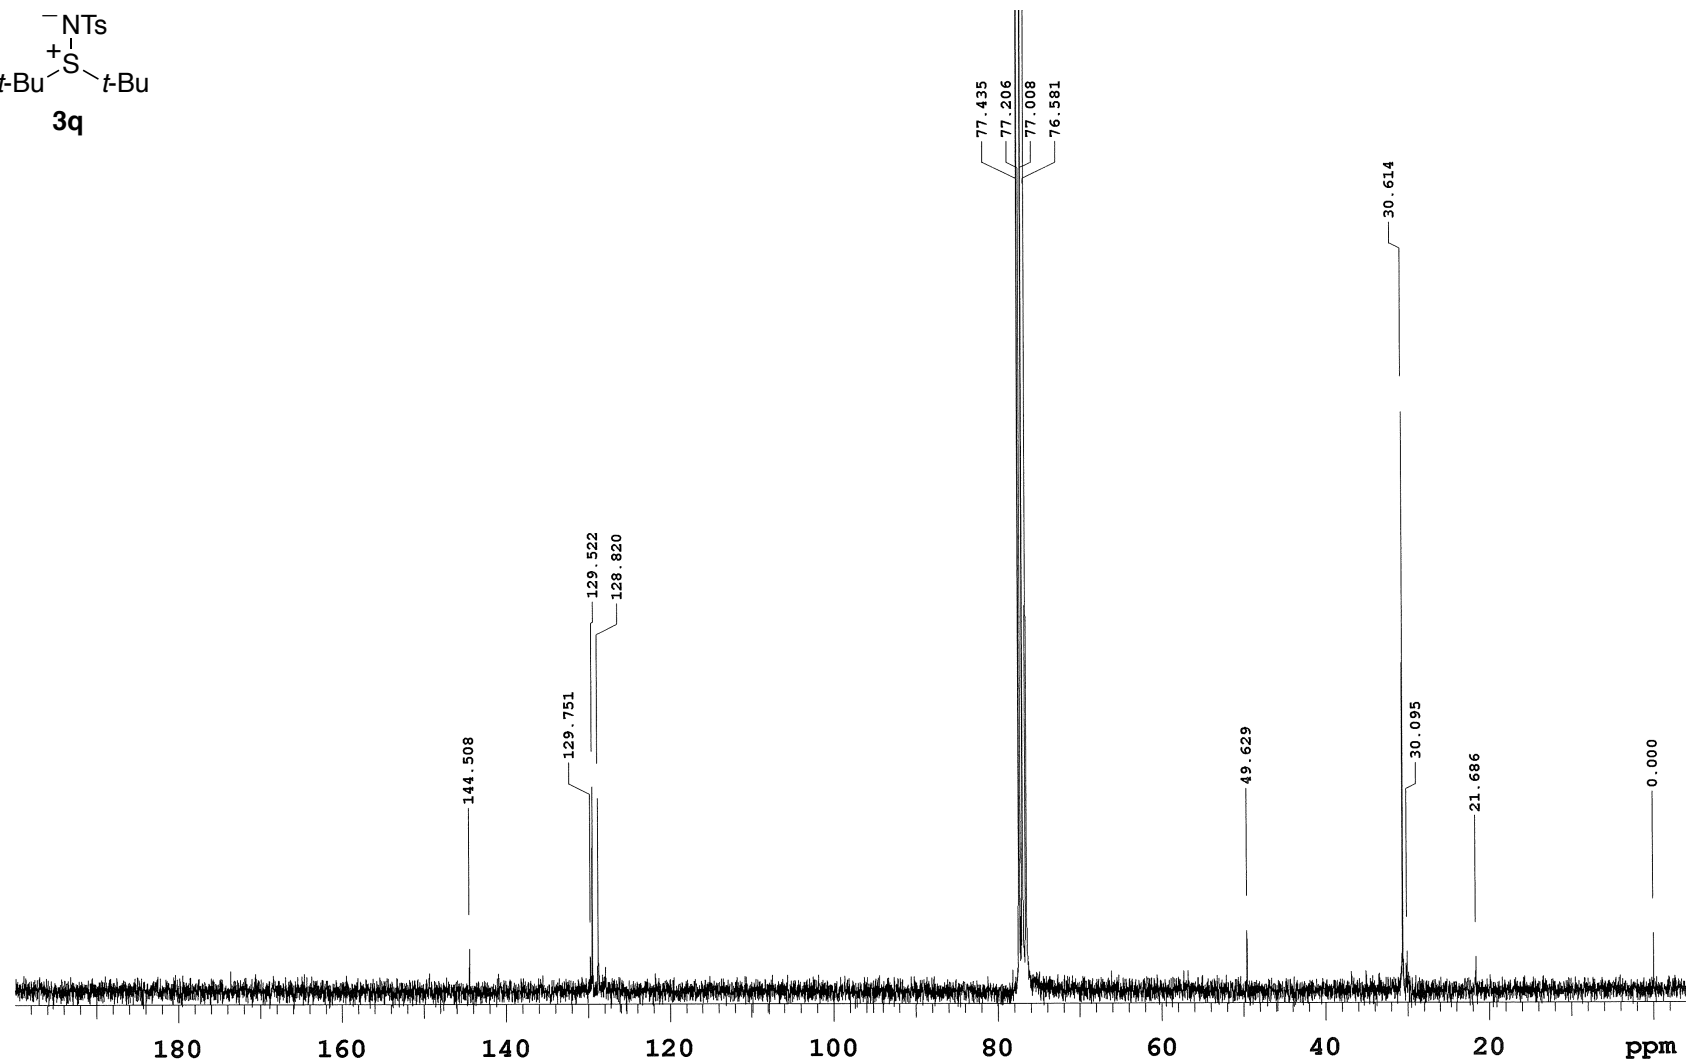

$^1\text{H}$  NMR (300 MHz,  $\text{CDCl}_3$ )

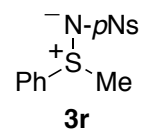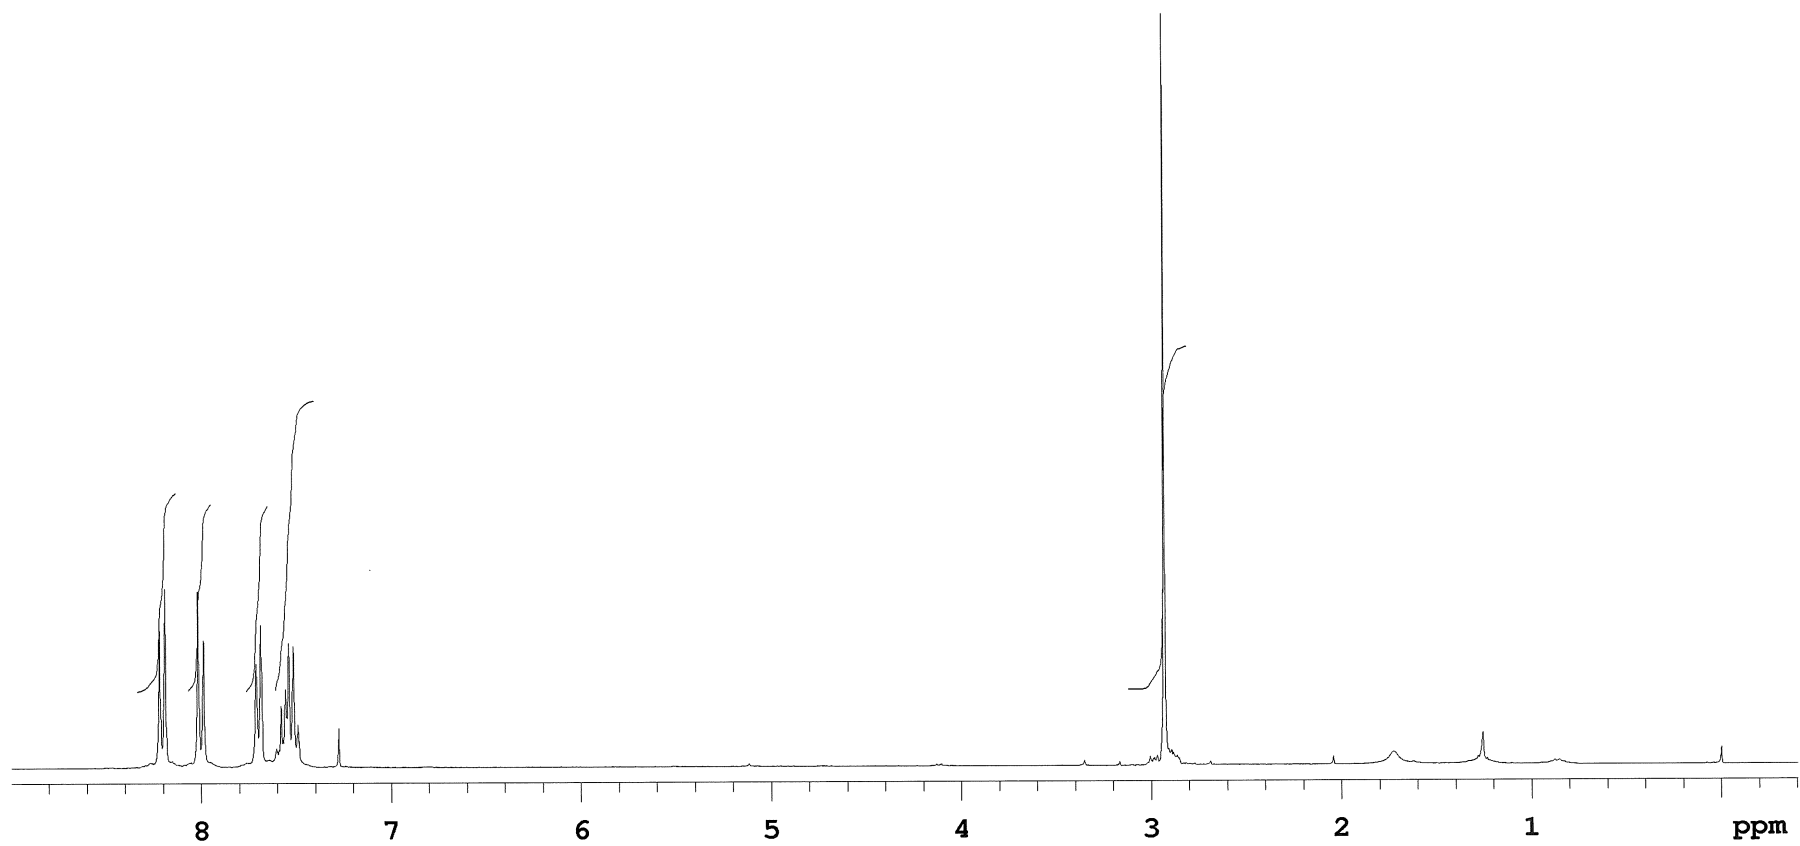

$^{13}\text{C}$  NMR (75 MHz,  $\text{CDCl}_3$ )

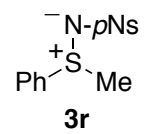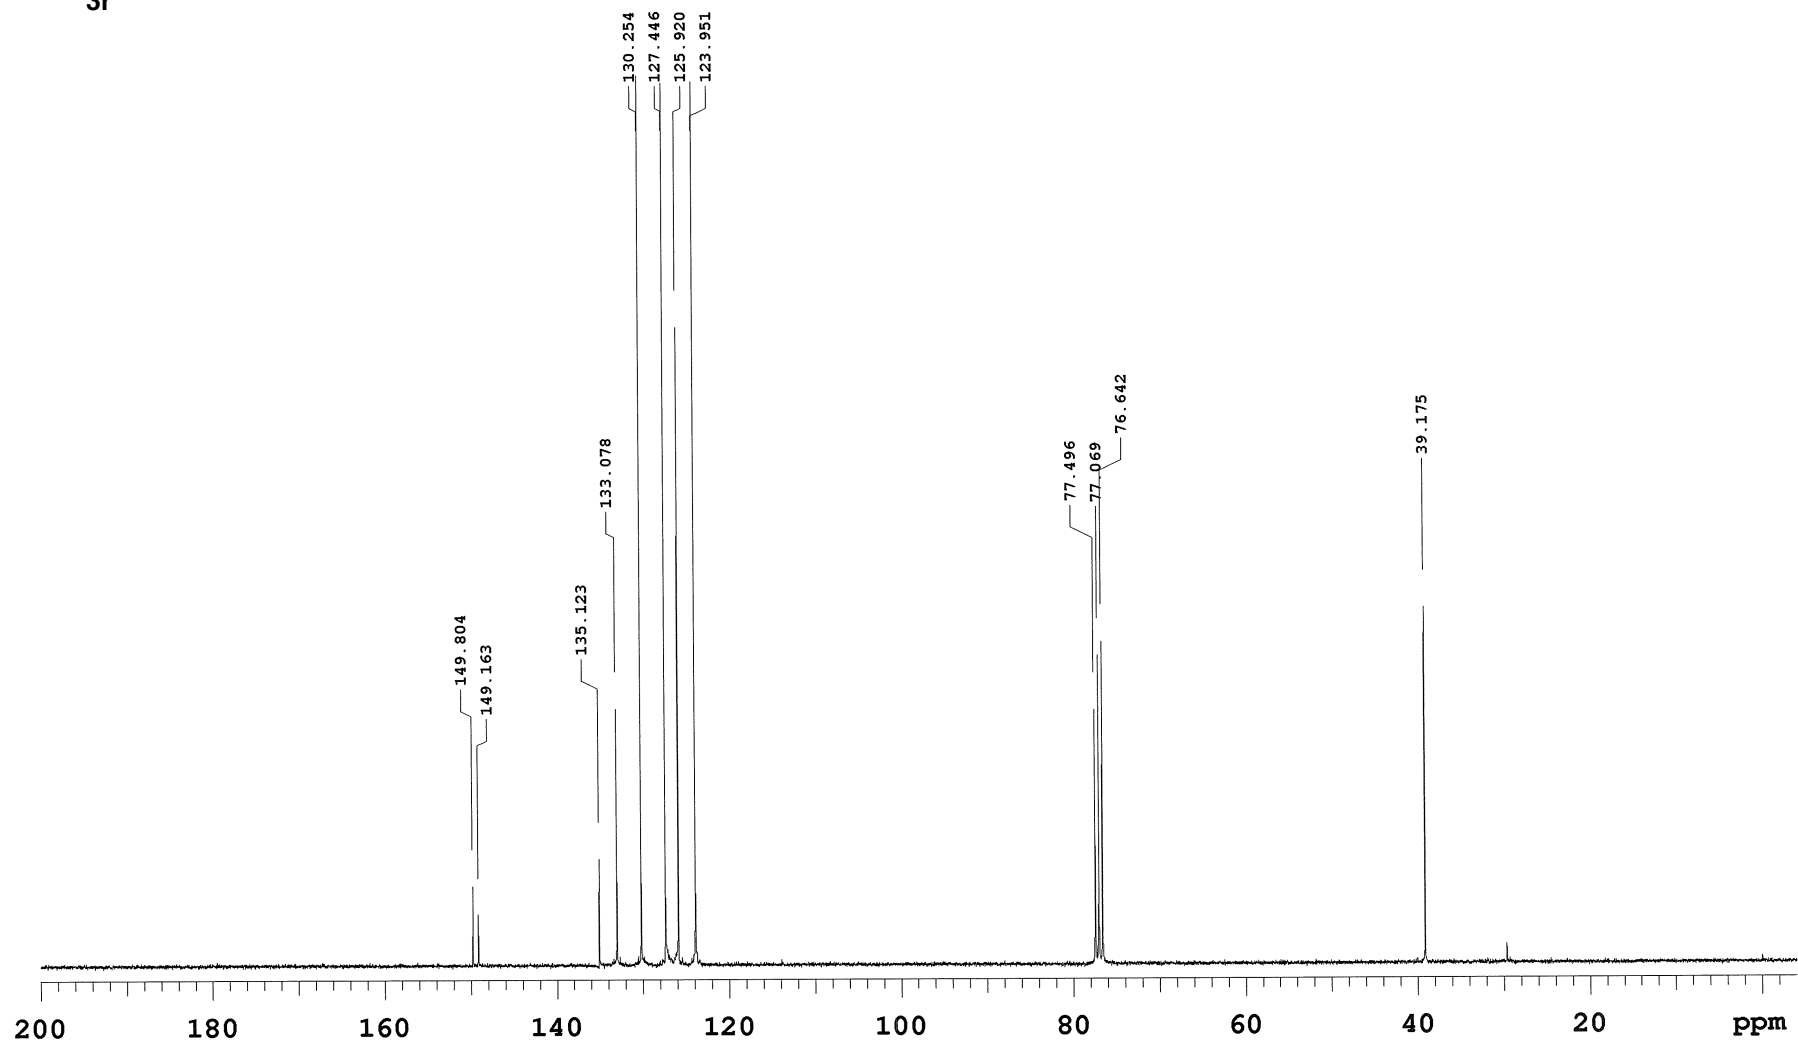

$^1\text{H}$  NMR (300 MHz,  $\text{CDCl}_3$ )

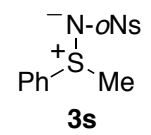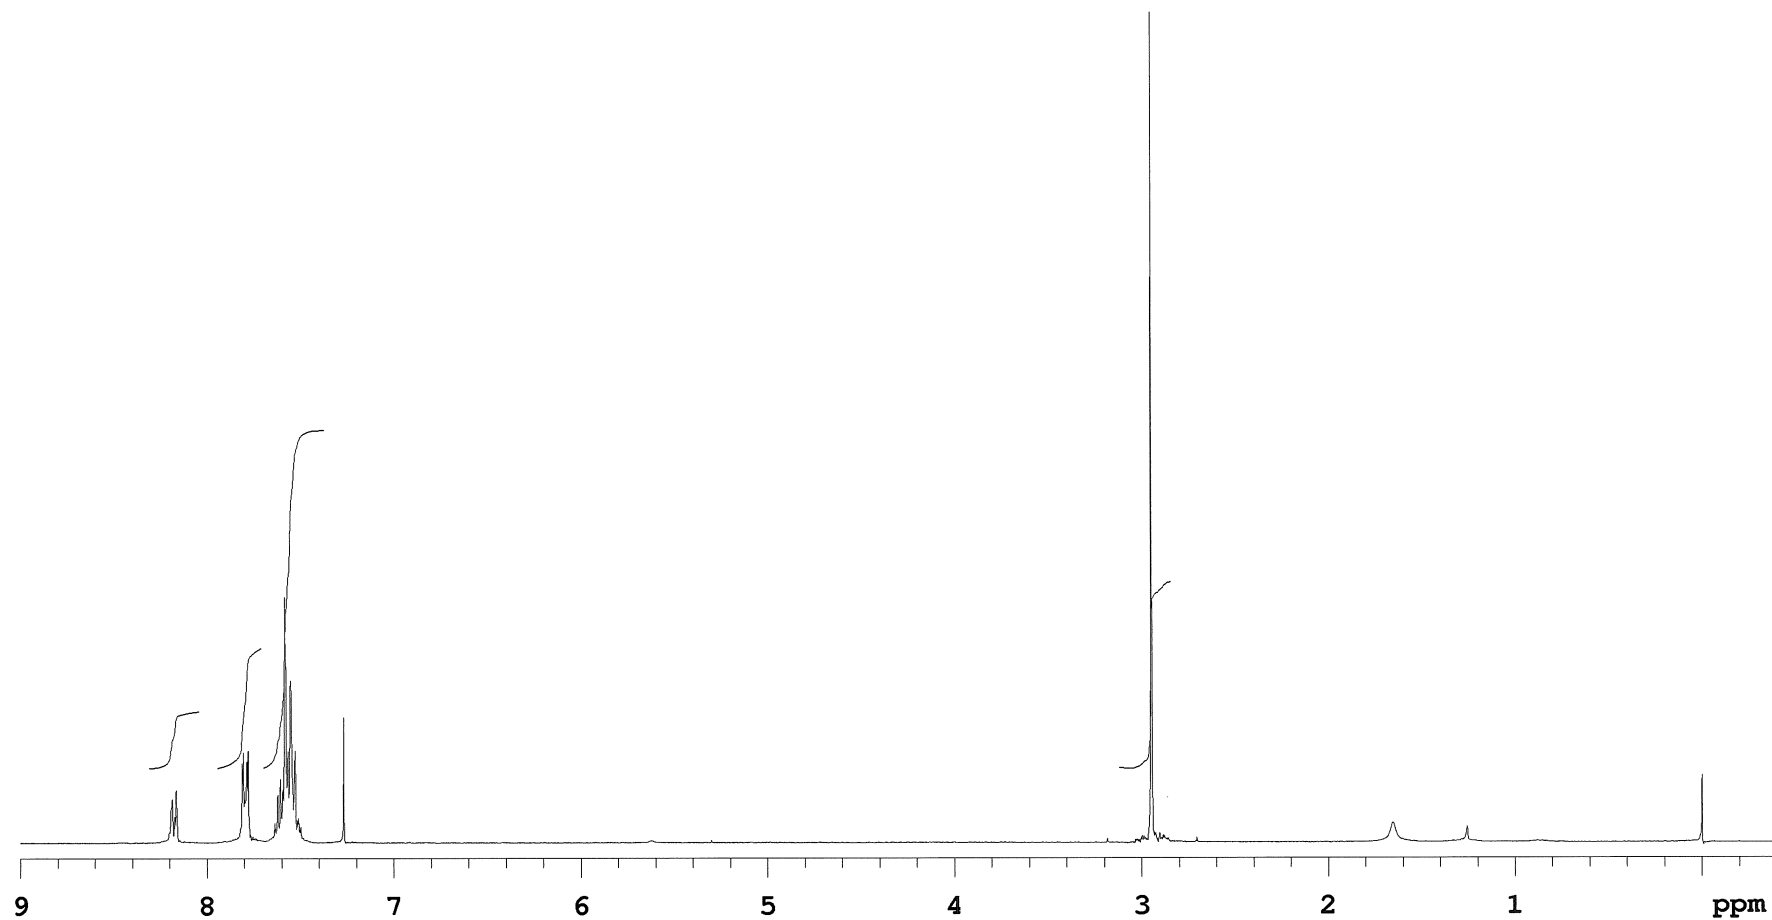

$^{13}\text{C}$  NMR (75 MHz,  $\text{CDCl}_3$ )

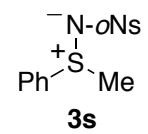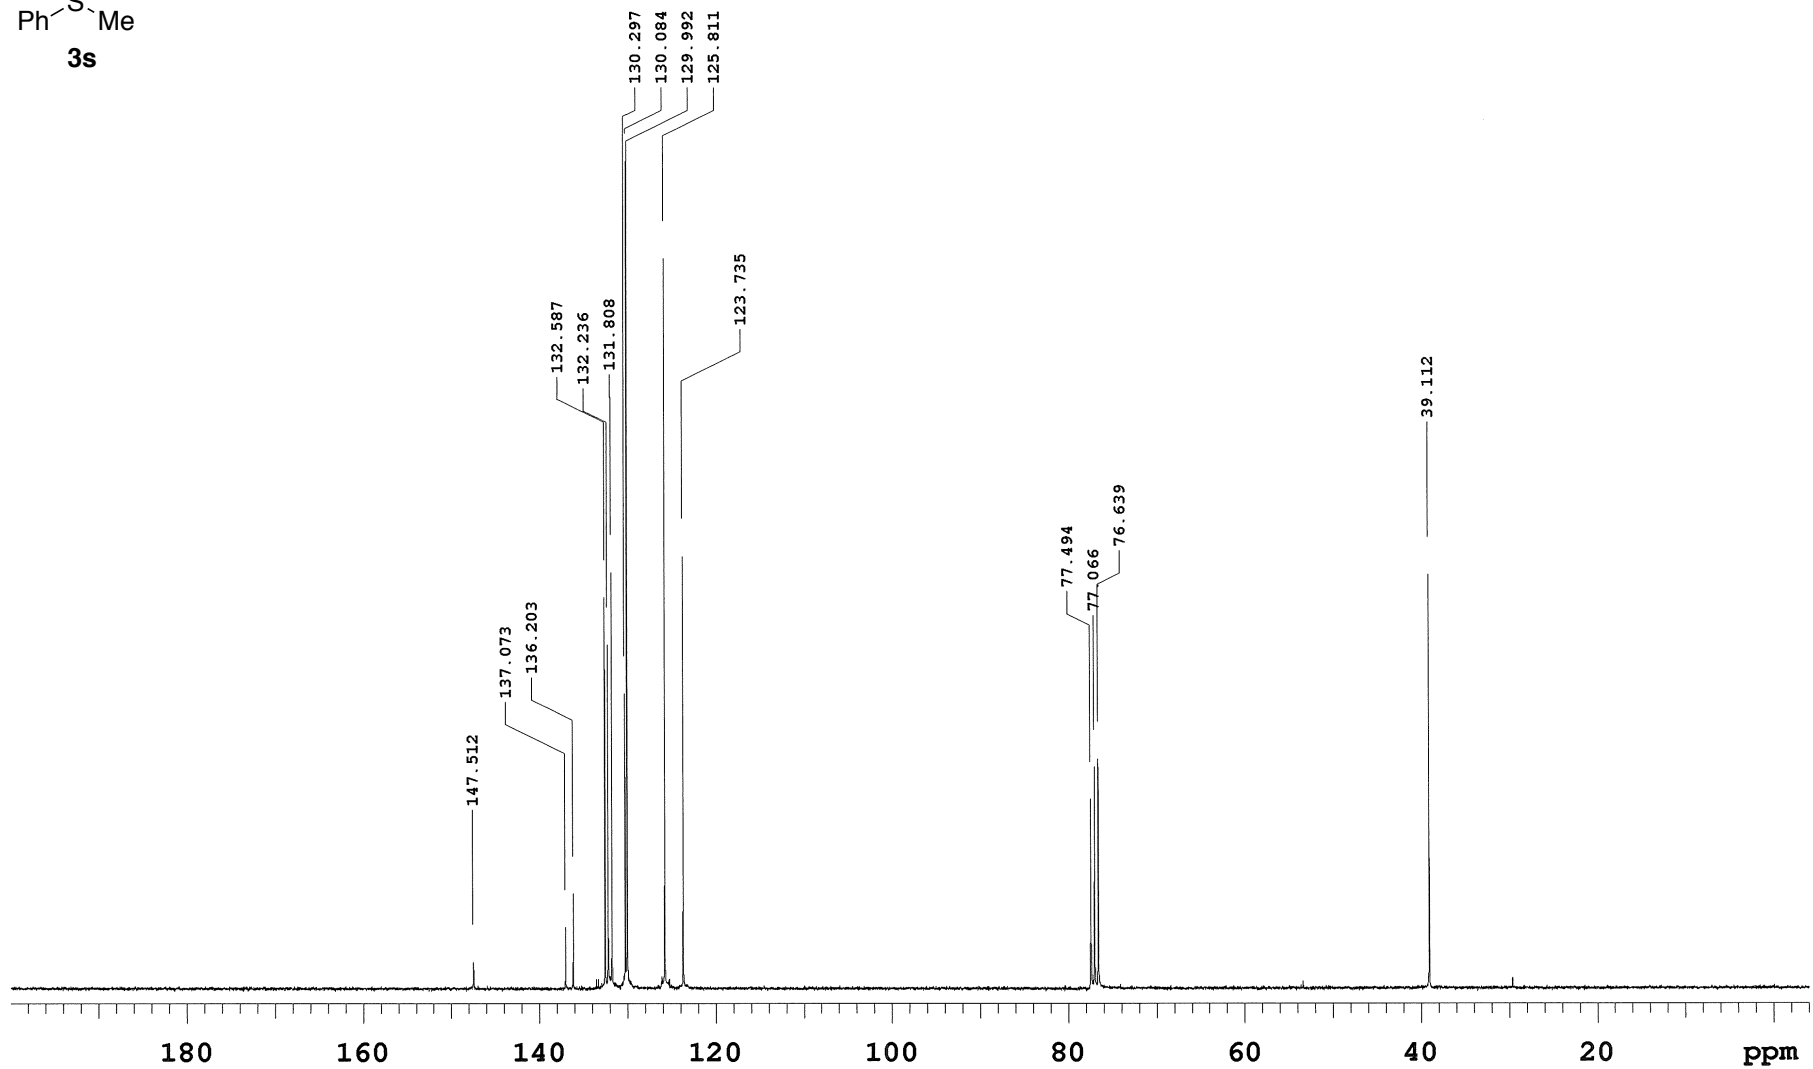

$^1\text{H}$  NMR (300 MHz,  $\text{CDCl}_3$ )

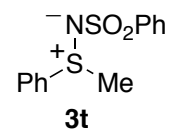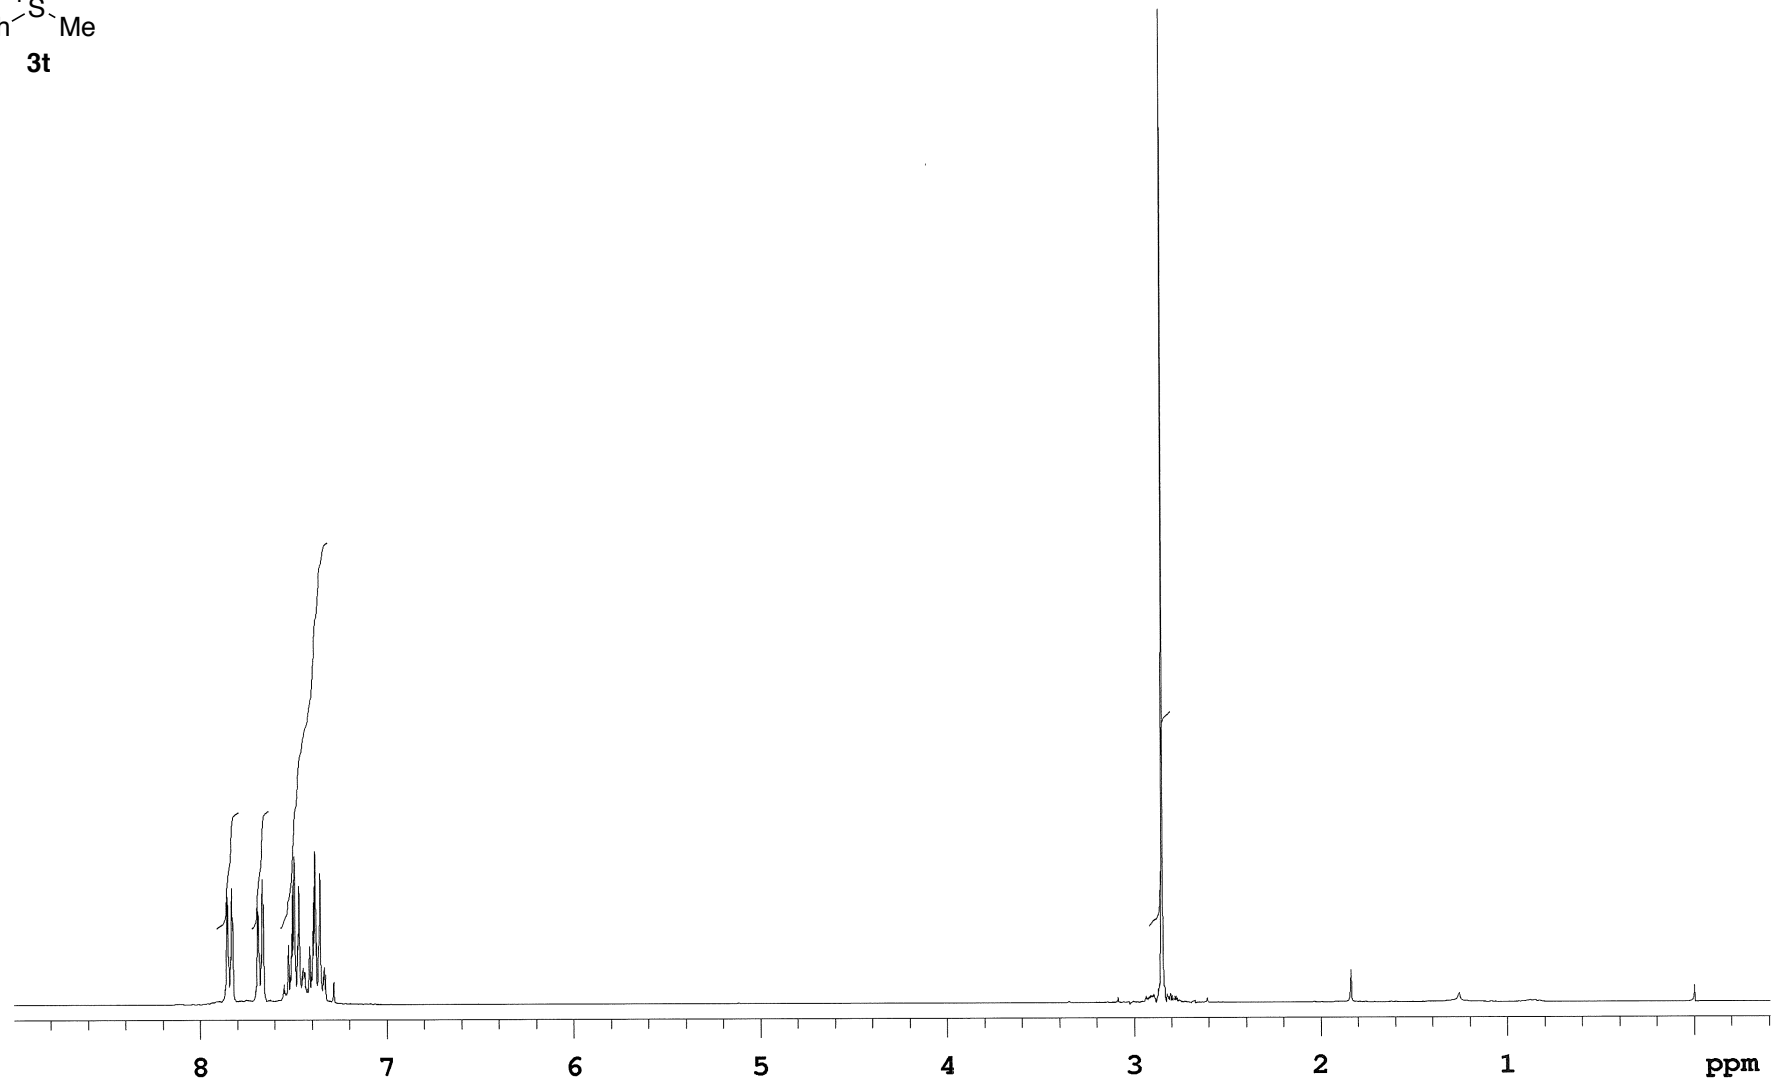



$^1\text{H}$  NMR (500 MHz,  $\text{CDCl}_3$ )

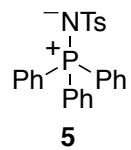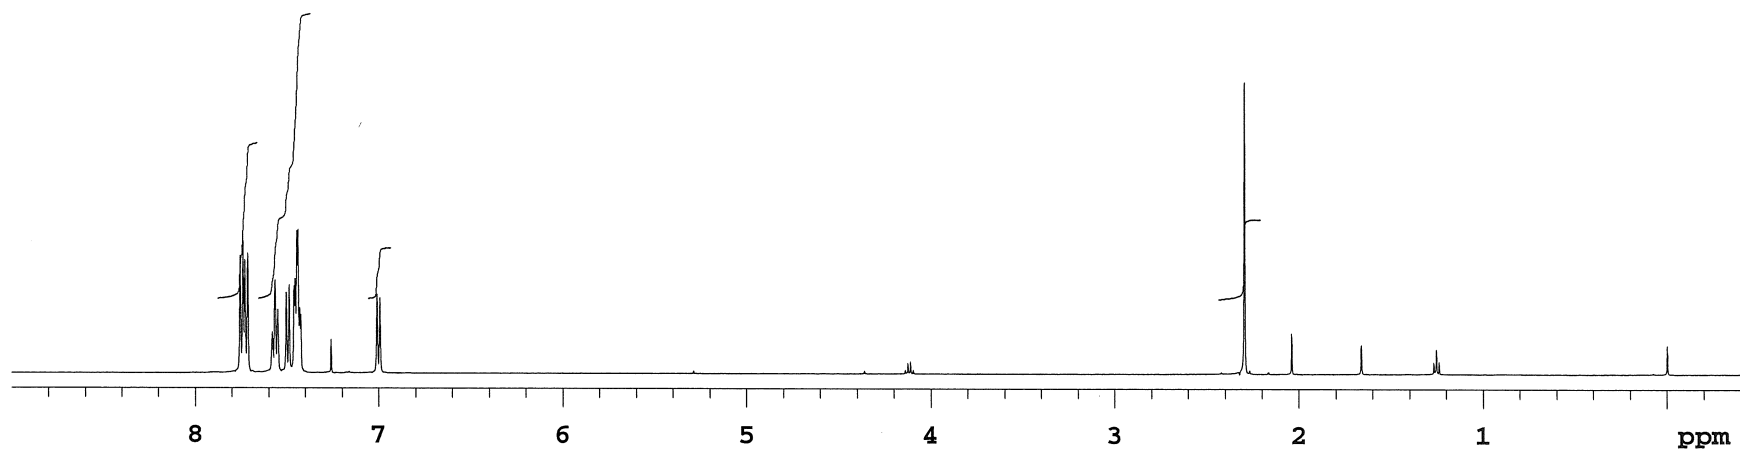

Supplement: s001 [file molecules-24-00979-s001.pdf]
